# Supplementary material
Source: ML conference proceedings conference paper supplement (https://openreview.net/forum?id=DZnBoIAy4V)
Supplement: supplementary_material [file neurips_2025-congested-app.pdf › neurips_2025-congested-app.pdf]

# Supplementary Material for the Paper “Assignments for Congestion-Averse Agents: Seeking Competitive and Envy-Free Solutions”

## A Additional Material for Section 2

### A.1 Proof of Lemma 1

- Lemma 1** (\*). (1) *CP implies EF, but the converse does not hold.*  
 (2) *CP implies NS, but the converse does not hold.*  
 (3) *NS implies TG and NW, but the converse does not hold.*  
 (4) *EF is incomparable to NS, to TG, and to NW, respectively; TG is incomparable to NW.*

*Proof.* (1) Clearly, CP implies EF by definition. Now, to show that the converse does not hold, let us consider Example 1. Clearly assigning every agent to post  $a_1$  is EF, but it is not CP since all agents prefer  $(a_2, 1)$  to  $(a_1, 3)$ .

(2) As already mentioned, the implication has been discussed by Bogomolnaia and Moulin [6] already. For the sake of completeness, we provide a proof by showing the contra-positive. Let  $\Pi$  be an assignment that is not NS and let there be an agent  $v \in V$  and a post  $a \in A$  such that  $v$  prefers  $(a, |\Pi(a)| + 1)$  to  $(a^*, |\Pi(a^*)|)$  where  $a^*$  denotes the post that  $v$  is assigned to. If  $a$  is empty, then clearly,  $\Pi$  is wasteful and hence not CP. If  $a$  is non-empty, then since every agent is averse against congestions, we infer that  $v$  prefers  $(a, |\Pi(a)|)$  to  $(a^*, |\Pi(a^*)|)$ , and hence not CP either.

Now, to show that the converse does not hold, let us consider Example 1 again. As already discussed there,  $\Pi_1$  is NS, but not CP.

(3) That NS implies NW follows directly from definition. That “NS implies TG” has also been shown by Bogomolnaia and Moulin [6]. Again, for the sake of completeness, we provide a proof here by showing the contra-positive. Let  $\Pi$  be an assignment that is not TG, and let  $v \in V$  be an agent and  $a^*$  a post such that  $v$  is assigned to  $a^*$  while  $(a^*, |\Pi(a^*)|)$  is *not* among his top- $|V|$  choices. Let  $X = \{(a, d) \mid (a, d) \succ_v (a^*, |\Pi(a^*)|)\}$  be the set consisting of all tuples that  $v$  prefers to  $(a^*, |\Pi(a^*)|)$ . Then,  $|X| \geq |V|$ . For each  $a \in A$ , let  $\delta(a)$  denote the largest congestion such that  $(a, \delta(a)) \in X$ , i.e.,  $\delta(a) = \max_{(a, d) \in X} \{d\}$  and  $\delta(a) = 0$  if no tuple  $(a, d)$  exists in  $X$ . Then,  $\sum_{a \in A} \delta(a) = |X| \geq |V| = \sum_{a \in A} |\Pi(a)|$ . By assumption, we have that  $\delta(a^*) < |\Pi(a^*)|$ . This implies that there must exist a post  $a \in A \setminus \{a^*\}$  such that  $\delta(a) > |\Pi(a)|$ . By definition, we infer that  $(a, |\Pi(a)| + 1) \in X$ , and hence  $(a, |\Pi(a)| + 1) \succ_v (a^*, |\Pi(a^*)|)$ , witnessing that  $\Pi$  is not NS.

It is quite straightforward to come up with a TG and NW assignment which is not NS. Let us consider the following example.

$$\begin{array}{l} v_1: (a_1, 1) \succ (a_1, 2) \succ (a_2, 1) \succ \dots, \\ v_2: (a_1, 1) \succ (a_2, 1) \succ (a_1, 2) \succ \dots, \\ v_3: (a_3, 1) \succ (a_3, 2) \succ (a_3, 3) \succ \dots \end{array} \quad \Pi_3: \begin{array}{c|c|c} a_1 & a_2 & a_3 \\ \hline v_2 & v_1 & v_3 \end{array} \quad \Pi_4: \begin{array}{c|c|c} a_1 & a_2 & a_3 \\ \hline v_1, v_2 & & v_3 \end{array}$$

$\Pi_3$  is clearly TG and NW. It is not NS however, since  $v_1$  prefers  $(a_1, 2)$  to  $(a_2, 1)$ .

(4) Let us consider Example 1. Assigning every agent to the same post is clearly EF, but not TG and not NW. Hence, it is not NS by Statement (3). As already argued in Example 1,  $\Pi_1$  is NS, TG, and NW, but not EF.

Assigning  $v_1$  and  $v_2$  to  $a_2$ , and  $v_3$  to  $a_1$  is NW, but not TG: For  $v_1$ , tuple  $(a_2, 2)$  is *not* in his top 3 choices.

Now, let us consider the example from item.  $\Pi_4$  is TG but not NW. □

By definition, we observe the following:

**Observation 2.** For an arbitrary tie-breaking rule,  $\sum_{a \in A} \lambda(v, a) = |V|$  holds for every  $v \in V$ .

### A.2 Proof of Lemma 2

**Lemma 2** (\*). Given a congestion vector  $\vec{s}$  with  $\sum_{a \in A} \vec{s}[a] = |V|$ , in polynomial-time one can determine the smallest number  $t$  of unsatisfied agents among all assignments whose congestion vectors equal  $\vec{s}$ ; the corresponding assignment can found in polynomial time.

517 *Proof.* The idea is to iterate over all possible number  $t \in \{0, 1, \dots, |V|\}$  and check whether there  
 518 exists an assignment with congestion vector  $\vec{s}$  and exactly  $t$  unsatisfied agents. The later problem  
 519 can be solved via determining whether a perfect  $\vec{b}$ -matching exists, which can be done in polynomial  
 520 time [29, Chapter 12].

521 Let  $(A, V, (\succ)_{v \in V})$  be an instance of CONGESTED ASSIGNMENT. To check whether there exists an  
 522 assignment with congestion vector  $\vec{s}$  and exactly  $t$  unsatisfied agents, we construct a bipartite graph  $G$   
 523 on two disjoint  $X$  and  $Y$  with  $X = A \cup \{a_0\}$  and  $Y = V \cup \{w_1, \dots, w_t\}$ , where the  $w_z$ 's are the  
 524 dummy agent-vertices and  $a_0$  is a dummy post-vertex.

525 We add an edge between every original post  $a_j$  and every dummy agent-vertex  $w_z$ , and an edge  
 526 between the dummy post-vertex  $a_0$  and every original agent  $v_i$ . We also add an edge between every  
 527 original post and original agent, but will delete some according to the congestion vector. In other  
 528 words, the graph on  $X$  and  $Y$  is almost a complete bipartite graph, except there are no edges between  
 529 the dummy post  $a_0$  and any dummy agent  $w_z, z \in [t]$ .

530 We delete from the bipartite graph the following edges: For each original agent  $v$  and each two  
 531 original posts  $a$  and  $a'$ , if  $v$  prefers  $(a, \max(1, \vec{s}[a]))$  to  $(a', \vec{s}[a'])$ , then we delete the edge  $\{a', v\}$ .  
 532 This is because if  $v$  would be satisfied, he will never be assigned to  $a'$  since either the post is wasteful  
 533 or he envies some agent that is assigned to  $a$ .

534 This completes the construction of the graph  $G$ . We check whether there exists a perfect  $\vec{b}$ -matching<sup>3</sup>  
 535 for  $G$  where  $\vec{b}[a_0] = t, \vec{b}[a_j] = \vec{s}[a_j]$  for all  $a_j \in A$ , and  $\vec{b}[y] = 1$  for all  $y \in Y$ . We answer no if  
 536 no such matching exists. Otherwise, let  $M$  be the perfect  $\vec{b}$ -matching, and we return the following  
 537 partition as assignment  $\Pi$ . For each post  $a_j \in A$  and agent  $v_i \in V$ , let  $\Pi(v_i) = a_j$  if  $\{v_i, a_j\} \in M$ .  
 538 Let  $V'$  be the remaining agents that are unassigned; note that these agents are matched to  $a_0$  by  
 539 definition. As long as the congestion of some  $a_j \in A$  is not equal to  $\vec{s}[a_j] = \vec{b}[a_j]$ , pick an agent  
 540 from  $V'$  and assign him to  $a_j$ .

541 For the correctness, it is straightforward that if  $\Pi$  is an assignment with congestion vector  $\vec{s}$  and  
 542 exactly  $t$  unsatisfied agents  $V'$ , then the following matching is a perfect  $\vec{b}$  matching: Let  $M(v_i) = a_j$   
 543 if  $v_i \in V \setminus V'$ , and  $M(v_i) = a_0$  if  $v_i \in V'$ . Finally, for each original post  $a_j$ , if it is assigned  $\hat{n}$   
 544 unsatisfied agents, then we pick  $\hat{n}$  distinct dummy agent-vertices and match them to  $a_j$ .

545 If  $M$  is a perfect  $\vec{b}$ -matching for  $G$ , then  $a_0$  is matched with exactly  $t$  original agents  $V'$  who will be the  
 546 unsatisfied agents. Clearly, the assignment  $\Pi$  given by our algorithm above has the desired congestion  
 547 vector  $\vec{s}$ . We show that only the agents from  $V'$  may be unsatisfied. Consider an arbitrary agent  $v_i \in$   
 548  $V \setminus V'$  and post  $a_j \in A \setminus \{\Pi(v_i)\}$ . For a contradiction, suppose  $v_i$  prefers  $(a_j, \max(1, |\Pi(a_j)|))$   
 549 to  $(a^*, |\Pi(a^*)|)$ , where  $v_i$  is assigned to  $a^*$ , i.e.,  $\{v_i, a^*\} \in M$ . By the definition of  $\Pi$ , it follows  
 550 that  $v_i$  prefers  $(a_j, \max(1, \vec{s}(a_j)))$  to  $(a^*, \vec{s}(a^*))$ , implying that edge  $\{v_i, a^*\}$  does not exist in the  
 551 constructed bipartite graph and cannot be matched under  $M$ , a contradiction.

552 Since checking the existence of a perfect  $\vec{b}$ -matching and finding such a matching if it exists can be  
 553 done in polynomial time by reducing to finding a perfect matching, the whole approach can be done  
 554 in polynomial time as well. This completes the proof.

555 For an illustration, consider the first instance in Example 1. Let the congestion vector be  $\vec{s} = (2, 1)$   
 556 and the number of unsatisfied agents be  $t = 0$ . The following bipartite graph  $G$  has a perfect  $\vec{b}$ -  
 557 matching, indicated by the red lines.

558

|             |       |             |             |             |             |             |
|-------------|-------|-------------|-------------|-------------|-------------|-------------|
| $\vec{b} :$ | $a_0$ | $\hat{a}_1$ | $\hat{a}_2$ | $\hat{v}_1$ | $\hat{v}_2$ | $\hat{v}_3$ |
|             | 0     | 2           | 1           | 1           | 1           | 1           |

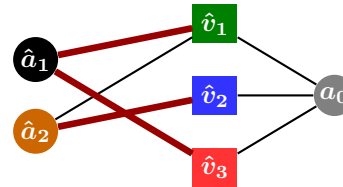

559 Indeed, the corresponding  $\vec{b}$ -matching yields a CP assignment which is  $\Pi_2$  and it has only satisfied  
 560 agents.  $\square$

<sup>3</sup>A  $\vec{b}$ -matching  $M$  is *perfect* if  $\sum_{e \in M: u \in e} 1 = \vec{b}[u]$  holds for all vertices  $u$ .

## B Additional Material for Section 3.1

### B.1 Example of Construction 1

Let us consider the four agents with the following preference lists.

$$\begin{aligned} v_1: & (a_1, 1) \succ (a_2, 1) \succ (a_3, 1) \sim (a_1, 2) \sim (a_2, 2) \succ \dots, \\ v_2, v_3: & (a_2, 1) \succ (a_1, 1) \succ (a_3, 1) \sim (a_1, 2) \sim (a_2, 2) \succ \dots, \\ v_4: & (a_1, 1) \sim (a_2, 1) \succ (a_1, 2) \sim (a_2, 2) \succ (a_3, 1) \succ \dots, \end{aligned}$$

One can observe that if every post is filled, then  $a_1$  or  $a_2$  will have congestion one. If  $a_1$  has congestion one, then  $v_1$  has to be assigned to  $a_1$  alone and  $v_4$  to  $a_2$  alone, leaving  $v_2$  and  $v_3$  to be envious. If  $a_2$  has congestion one, then  $v_2$  or  $v_3$  will be envious. One can verify that assigning any two agents to  $a_1$  and the remaining two to  $a_2$  is competitive, leaving  $a_3$  empty.

Now, let us “guess” that the number of empty post is  $k = 1$ . For  $k = 1$ , we augment the instance with one dummy agent  $u_1$  and two auxiliary agents  $p_1$  and  $p_2$ , and two dummy posts  $b_1$  and  $b_2$ . Their preference lists are as follows:

$$\begin{aligned} u_1: & (a_1, 1) \sim (a_2, 1) \sim (a_3, 1) \succ (b_1, 1) \succ (b_1, 2) \succ (b_1, 3); \\ p_1: & (b_1, 1) \succ (b_2, 1) \succ (b_2, 2) \succ \dots \succ (b_2, 5); \\ p_2: & (b_2, 1) \succ (b_1, 1) \succ (b_1, 2) \succ \dots \succ (b_1, 5). \end{aligned}$$

One can verify that in the original instance, every CP assignment will leave  $a_3$  empty, and in the augmented instance, every CP assignment will assign the dummy agent  $u_1$  to  $a_3$  alone. The correctness is given by Lemma 3.

### B.2 Proof of Observation 1

**Observation 1** ( $\star$ ). Let  $I_k = (A^*, V^*, (\succeq_v^*)_{v \in V^*})$  denote the instance created by Construction 1 with  $A^* = A \cup \{b_1, b_2\}$  and  $V^* = V \cup \{u_i \mid i \in [k]\} \cup \{p_1, p_2\}$ . Every CP assignment of  $I_k$  (if it exists) satisfies the following: (1)  $p_1$  is assigned to  $b_1$  alone, and  $p_2$  to  $b_2$  alone. (2) Every dummy  $u_z$  with  $1 \leq z \leq k$  is assigned to some  $a_j \in A$  alone. (3) Every original  $v_i \in V$  is assigned to some original post.

*Proof.* Let  $\Pi$  be a CP assignment of  $I_k$  with  $\Pi = (S_a)_{a \in A^*}$ . To show the first part of statement (1), we observe that if  $p_1$  is assigned to  $b_1$ , then  $|S_{b_1}| = 1$ , due to the maximum congestion of  $p_1$  towards  $b_1$ . Thus, it suffices to show that  $p_1$  is indeed assigned to  $b_1$ . Suppose, for the sake of contradiction, that  $p_1$  was assigned to  $b_2$  instead; note that he will not be assigned to any original post  $a_j$  due to his maximum congestion towards  $a_j$ . Then, by the maximum congestion of  $p_2$  towards  $b_2$ , agent  $p_2$  could not be assigned to  $b_2$ . No original agent could be assigned to  $b_2$  either, due to his maximum congestion towards  $b_2$ . Hence, we would have  $S_{b_2} = \{p_1\}$  and  $p_2$  would envy  $p_1$ , a contradiction to the competitiveness.

The second part of statement (1) follows directly from the first part since  $b_2$  is the only acceptable post left for  $p_2$  and his maximum congestion towards  $b_2$  is one.

By statement (1) and the maximum congestions, every dummy agent  $u_z$  can only be assigned to some original post alone, proving statement (2). The last statement follows directly from the first two statements.  $\square$

### B.3 Continuation of the proof of Lemma 3

**Lemma 3** ( $\star$ ). An instance  $I$  admits a CP assignment if and only if there exists an integer  $k$  with  $\max(0, m - n) \leq k \leq m - 1$  such that the instance  $I_k$  created by Construction 1 admits a CP assignment with only filled post.

We continue to show why the derived assignment  $\Pi_k$  is CP for  $I_k$ . Since no post is empty, showing competitiveness reduces to showing that no agent is envious. This is clearly the case for all dummy agents including  $p_1$  and  $p_2$  since they are assigned to one of their most preferred posts alone. No original agent envies any other original agent or any dummy agent since  $\Pi$  is CP for  $I$ . No original agent  $v \in V$  envies  $p_1$  or  $p_2$  since  $p_1$  and  $p_2$  are assigned to  $b_1$  and  $b_2$ ,  $\Pi$  is TG for  $I$ , and  $b_1$  and  $b_2$  occurs at the end of  $\succeq_v^*$ . This shows that  $\Pi_k$  is CP for  $I_k$ , as desired.

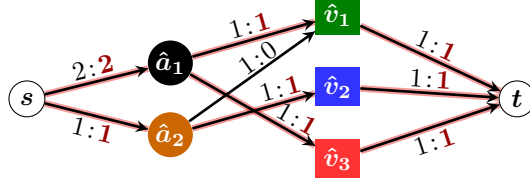

Figure 2: Flow network for iteration 2 where  $T = (2, 1)$ . For more information, see Appendix B.4.

For the “if” part, let  $k$  be an integer between  $\max(0, m - n)$  and  $m - 1$  such that the created instance  $I_k$  admits a CP assignment  $\Pi_k$  without empty post. We claim that the assignment  $\Pi$  derived from  $\Pi_k$  by omitting all dummy agents and the posts  $p_1$  and  $p_2$  is CP for  $I$ .

We first show that  $\Pi$  is a valid assignment for  $I$ . By Observation 1(2), every dummy agent is assigned to some original post *alone*, and hence for each  $a_j \in A$  that is not assigned any dummy agent (i.e.,  $\{u_1, \dots, u_k\} \cap \Pi_k(a_j) = \emptyset$ ), we have  $\Pi(a_j) = \Pi_k(a_j)$ ; and  $\Pi(a_j) = \emptyset$ , otherwise. This implies that  $\Pi(a_j) \subseteq V$ .

By Observation 1(3), every original agent is assigned to an original post, confirming that  $\Pi$  is indeed a valid assignment for  $I$ .

Next, suppose, for the sake of contradiction, that  $\Pi$  is not competitive and let  $v$  and  $a$  be an agent and a post, respectively, such that  $(a, \max(|\Pi(a)|, 1)) \succ_v (a', |\Pi(a')|)$  where  $a'$  is the post that  $v$  is assigned to by  $\Pi$ . We infer that  $\Pi(a)$  cannot be empty since otherwise by Construction 1 and by Observation 1(2) we would have that  $\Pi_k(a) = \{u_z\}$  for some dummy agent  $u_z$ . This further implies that  $v$  envies  $u_z$  in  $I_k$ , a contradiction to the competitiveness of  $\Pi_k$ . Since  $\Pi(a)$  is not empty and  $v \in \Pi(a')$ , again by Construction 1 and by Observation 1(2), we have that  $\Pi(a) = \Pi_k(a)$  and  $\Pi(a') = \Pi_k(a')$ . Since  $\succeq_v^*$  is an extension of  $\succeq_v$  for each  $v \in A$ , we obtain that  $(a, |\Pi_k(a)|) \succ_v^* (a', |\Pi_k(a')|)$  a contradiction to the competitiveness of  $\Pi_k$ .

#### B.4 Example of Algorithm 1

Consider the first instance in Example 1 and let us assume that we are in the case with  $k = 0$ , meaning that we can ignore  $a_0$  and the dummy agents. Initially,  $T[a_1] = T[a_2] = 1$ , implying that the condition in Line 4 is satisfied, so we can start with the first iteration. In the first iteration, where  $T = (1, 1)$ , the network and its maximum flow constructed in Phase 1 (Lines 5–6) have been discussed in Example 2 already. Hence, we proceed with line 7. Let the maximum flow  $f$  be as indicated in Example 2, i.e.,  $f(\hat{a}_1, t) = f(\hat{a}_2, t) = 1$  and  $f(\hat{a}_3, t) = 0$ . Since  $f$  does not have value  $|V| = 3$ , we proceed with Phase 2, where we find an obstruction in Lines 8–14. We start with  $V' = \{\hat{v}_3\}$  and  $A' = \emptyset$  since  $\hat{v}_3$  is the only vertex with  $f(\hat{v}_3, t) = 0$ . In the while-loop in lines 10–14, we first find  $\hat{a}_1$  and compute  $A' = \{\hat{a}_1\}$ . Then, we compute  $V' = \{\hat{v}_3, \hat{v}_1\}$  in line 13. Since no further post  $\hat{a}$  exists that has an arc to any agent  $\hat{v}$  in  $V'$  (see the figure in Example 2), we stop with  $A' = \{\hat{a}_1\}$  and  $V' = \{\hat{v}_3, \hat{v}_1\}$ . One can check that if  $a_1$  would stay with congestion one, then no CP assignment can exist since both  $v_1$  and  $v_3$  would envy the only agent that is assigned to  $a_1$ . We will later show that in order to have a CP assignment, it is necessary to increase the congestion of every post in  $A'$ . In Phase 3, we increment  $T[a_1]$  to 2, while the other post stays with  $T[a_2] = 1$ . This completes the first iteration.

At line 4, since  $T[a_1] + T[a_2] = 3 \leq |V|$ , we continue with the second iteration. In the following, the tuples considered in Construction 2(v) are boldfaced.

$$\begin{aligned} v_1: & (a_1, 1) \succ (\mathbf{a_1, 2}) \sim (\mathbf{a_2, 1}) \succ (a_2, 2) \succ \dots, \\ v_2: & (a_1, 1) \sim (\mathbf{a_2, 1}) \succ (a_1, 2) \sim (a_2, 2) \succ \dots, \\ v_3: & (a_1, 1) \succ (\mathbf{a_1, 2}) \succ (a_2, 1) \succ (a_2, 2) \succ \dots. \end{aligned}$$

One can verify that among all tuples  $(a, T[a])$ ,  $a \in A$ , tuple  $(a_1, 2)$  is the most preferred tuple of  $v_1$  and  $v_3$ , while  $(a_2, 1)$  is the most preferred tuple of  $v_1$  and  $v_2$ . Hence, the network and maximum flow (highlighted with red lines) constructed in Phase 1 are as given in Figure 2; note that this corresponds to the bipartite graph in Appendix A.2.

645 In Line 6, we verify that the maximum flow is a perfect flow (i.e., with value  $|V|$ ). Hence, we derive  
 646 and return an assignment according to Definition 2. This is exactly  $\Pi_2$  from Example 1.

647 One can verify that the second instance of Example 1 where every agent has the same preference  
 648 list as  $v_2$  will lead to the sum of the congestion entries to exceed  $|V| = 3$  in the second iteration,  
 649 certifying that the instance does not have a CP assignment, no matter with or without empty posts.

## 650 B.5 Proof of Lemma 4

651 **Lemma 4** ( $\star$ ). *Each  $(A', V')$  computed in Phase 2 in lines 8–14 is an obstruction.*

652 *Proof.* Let  $(A', V')$  be the pair computed in lines 8–14 in some iteration  $z$ . Let  $(G, c)$  be the network  
 653 with  $G = (\hat{A} \cup \hat{V} \cup \{s, t\}, E)$  and  $f$  the maximum flow computed in this iteration. We aim to show  
 654 that  $(A', V')$  satisfies the properties in Definition 3.

655 By line 7,  $f$  fails to have value  $|V|$ , i.e.,  $\sum_{\hat{v} \in \hat{V}} f(\hat{v}, t) < |V|$ . Hence, there must be a vertex  $\hat{v}^* \in \hat{V}$   
 656 with  $f(\hat{v}^*, t) = 0$ . Let  $\hat{v}^*$  be such a vertex that is added to  $V'$  in line 9. Then, the first part of  
 657 property (i) is clear since  $\hat{v}^* \in V'$  (line 9) and we only add vertices from  $\hat{V}$  to  $V'$ ; see line 13.

658 Property (ii) is also clear due to line 11.

659 Let us consider property (iii). Clearly, for every vertex  $\hat{a} \in A'$  with  $(\hat{a}, \hat{v}^*) \in E(G)$  we must have  
 660 that  $f(s, \hat{a}) = c(s, \hat{a})$  as otherwise we could increase the flow by one by setting  $f(s, \hat{a}) = f(s, \hat{a}) + 1$   
 661 and  $f(\hat{a}, \hat{v}^*) = f(\hat{v}^*, t) = 1$ . By line 13, every out-neighbor  $\hat{v}$  of  $\hat{a}$  with  $f(\hat{a}, \hat{v}) = 1$  is added to  $V'$ .  
 662 Together with  $\hat{v}^*$ , we obtain that  $c(s, \hat{a}) < |\{\hat{v} \in V' \mid (\hat{a}, \hat{v}) \in E\}|$  since  $f(\hat{v}^*, t) = 0$ , as desired.

663 Consider an arbitrary vertex  $\hat{a} \in A'$  with  $(\hat{a}, \hat{v}^*) \notin E(G)$ . Suppose, towards a contradiction, that  $\hat{a}$   
 664 does not satisfy property (iii), meaning that  $c(s, \hat{a}) \geq |\{\hat{v}' \in V' \mid (\hat{a}, \hat{v}') \in E(G)\}|$ . We aim to show  
 665 that there is an “augmenting” path from  $\hat{a}$  to  $\hat{v}^*$ , with arcs having flow values alternating between  
 666 zero and one, which is a witness for the flow to be not maximum.

667 Let us go through the **repeat**-loop in lines 10–14. Observe that in each round of this loop, we aim at  
 668 finding a vertex  $\hat{a}$  not already in  $A'$  that has an out-arc to some agent-vertex from  $V'$ ;  $V'$  is initialized  
 669 with  $V' = \{\hat{v}^*\}$ . This implies that we can find a vertex in  $\hat{v}_x \in V' \setminus \{\hat{v}^*\}$  due to which we add  $\hat{a}$  in  
 670 line 11. Further, for each vertex  $\hat{v}'$  in  $V' \setminus \{\hat{v}^*\}$ , we can also find a vertex  $\hat{a}'$  in a previous round such  
 671 that  $f(\hat{a}', \hat{v}') = 1$  in line 13. Let  $\hat{a}_x$  be the vertex from  $A'$  due to which we add  $\hat{v}_x$ , i.e.,  $f(\hat{a}_x, \hat{v}_x) = 1$ .  
 672 Since each vertex in  $V'$  has only one out-arc with capacity one, due to the conservation constraint  
 673 of the flow  $f$ , we infer that  $f(\hat{a}, \hat{v}_x) = 0$ ; recall that  $f(\hat{a}_x, \hat{v}_x) = 1$ . Repeating the above reasoning,  
 674 there must be a vertex  $\hat{v}_{x-1}$  from  $V' \setminus \{\hat{v}_x\}$  due to which we add  $\hat{a}_x$ . Then, either  $\hat{v}_{x-1} = \hat{v}^*$  or  
 675  $\hat{v}_{x-1} \neq \hat{v}^*$ .

676 In the former case, we infer that  $(\hat{a}, \hat{v}_x, \hat{a}_x, \hat{v}^*)$  is an augmenting path since by assumption  $\hat{a}$  has  
 677 enough capacity to accommodate all incident agents, including  $\hat{v}_x$ . Thus, flipping the flow values  
 678 along the path would increase the value of the flow:

$$f(s, \hat{a}) = f(s, \hat{a}) + 1, \quad f(\hat{a}, \hat{v}_x) = 1, \quad f(\hat{a}_x, \hat{v}_x) = 0, \quad f(\hat{a}_x, \hat{v}^*) = f(\hat{v}^*, t) = 1, \text{ a contradiction.}$$

679 In the latter case, since  $V'$  is finite and no vertex from  $\hat{V}$  can obtain more than one positive flow, by  
 680 repeating the above reasoning, we must end up with an arc to  $\hat{v}^*$  with zero flow; recall that  $\hat{v}^* \in V'$ .  
 681 Then, we again obtain an augmenting path  $P = (\hat{a}, \hat{v}_x, \hat{a}_x, \dots, \hat{a}_0, \hat{v}_0 = \hat{v}^*)$ . Analogously, we can  
 682 increase the total flow by flipping the flow values along this path, a contradiction.

683 It remains to show property (iv). This is clear since otherwise for each vertex  $\hat{v} \in V'$  we could find a  
 684 vertex  $\hat{a} \in A'$  and set  $f(\hat{a}, \hat{v}) = f(\hat{v}, t) = 1$ . In particular, the starting vertex  $\hat{v}^*$  would have positive  
 685 flow going through it, a contradiction.  $\square$

## 686 B.6 Proof of Lemma 5

687 **Lemma 5** ( $\star$ ). *Assume that  $I$  admits a CP assignment  $\Pi$  with no posts being empty. Then, for each  
 688 iteration  $z \geq 1$ , each obstruction  $(A', V')$  found in iteration  $z$ , and each post  $a \in A$ , the following  
 689 holds. If  $\hat{a} \in A'$ , then  $|\Pi(a)| \geq T_z[a] + 1$ ; otherwise  $|\Pi(a)| \geq T_z[a]$ .*



690 *Proof.* Let us consider the first iteration and let  $(A', V')$  be the found obstruction. Since  $\Pi$  does not  
 691 have empty posts, the statement clearly holds for all posts  $a \in A$  with  $\hat{a} \notin A'$ . Let  $N = (G, c)$  denote  
 692 the network and  $f$  the maximum flow of  $N$  computed in the first phase. Let  $P = \{v \in V \mid \hat{v} \in V'\}$   
 693 and  $Q = \{a \in A \mid \hat{a} \in A'\}$  be the set of agents and posts that correspond to the vertices in  $V'$  and  
 694  $A'$ , respectively.

695 Suppose, for the sake of contradiction, that there exists a post  $a \in Q$  with  $|\Pi(a)| \leq T_1[a] = 1$ .  
 696 By Definition 3(iii), more than  $c(s, \hat{a}) = T_1[a] = 1$  vertex from  $V'$  is incident to  $\hat{a}$  in  $G$ . By  
 697 Construction 2(v), at least two agents from  $P$  consider  $(a, 1)$  as one of the most preferred tuples.

698 Since  $|\Pi(a)| \leq 1$ , at least one agent from  $P$  is not assigned to  $a$  but considers  $(a, 1)$  as one of the  
 699 most preferred tuples. Let  $v_0 \in P$  be such an agent. Then, he must be assigned to some other  
 700 post  $a_0$  such that  $(a_0, |\Pi(a_0)|)$  is one of the most preferred tuples for  $v_0$  as well. This implies that  
 701  $|\Pi(a_0)| = 1$  since we are in the first iteration. By Construction 2(v), we infer that  $(\hat{a}_0, \hat{v}_0) \in E(G)$ ,  
 702 and by line 11, that  $\hat{a}_0 \in A'$ .

703 By Definition 3(iii), more than  $c(s, \hat{a}_0) = T_1[a_0] = 1$  vertex from  $V'$  is incident to  $\hat{a}_0$  in  $G$ , and we  
 704 can find another agent  $v_1 \in P$  that is not assigned to  $a_0$  but considers  $(a_0, 1)$  as one of the most  
 705 preferred tuples. Again, this agent  $v_1$  will be assigned to some post  $a_1$  with  $(a_1, 1)$  being one of the  
 706 most preferred tuples of  $v_1$ . By Construction 2(v), we infer that  $(\hat{a}_1, \hat{v}_1) \in E(G)$ , and by line 11 that  
 707  $\hat{a}_1 \in A'$ . Repeating the above reasoning, we will be able to find a distinct vertex  $\hat{a}_i \in A'$  for each  
 708 vertex  $\hat{v}_i \in V'$  such that  $\Pi(a_i) = \{\hat{v}_i\}$ . That is,  $|A'| \geq |V'|$ , a contradiction to Definition 3(iv) since  
 709  $|A'| = \sum_{\hat{a} \in A'} c(s, \hat{a}) < |V'|$  in this case.

710 Now, let us consider other iterations. For each  $z$ , let  $(A'_z, V'_z)$  be the obstruction found in iteration  $z$ .  
 711 Note that the table entries never decrease. Hence, if the statement were incorrect, there must be an  
 712 iteration  $z \geq 2$  where the statement holds in all iterations  $z' \leq z - 1$  but not in iteration  $z$ .

713 Suppose, for the sake of contradiction, that the statement is incorrect and let  $z$  be the index of the first  
 714 such iteration where the statement is incorrect. That is, in all iterations  $z' \leq z - 1$ , we have that for  
 715 all  $a' \in A$ ,

$$\text{if } \hat{a}' \in A'_z, \text{ then } |\Pi(a')| \geq T_{z'}[a'] + 1; \text{ otherwise } |\Pi(a')| \geq T_{z'}[a'] \quad (1)$$

but there exists a post  $a$  such that

$$\text{if } \hat{a} \in A'_z, |\Pi(a)| \leq T_z[a]; \text{ if } \hat{a} \notin A'_z, \text{ then } |\Pi(a)| < T_z[a]. \quad (2)$$

716 First, observe that  $\hat{a} \in A'_z$  since otherwise  $|\Pi(a)| \geq T_{z-1}[a] = T_z[a]$  by line 15, a contradiction to the  
 717 assumption.

718 Next, we claim that  $T_z[a] = |\Pi(a)|$ . If  $\hat{a} \in A'_{z-1}$  (i.e.,  $\hat{a}$  was in the obstruction found in iteration  $z - 1$ ),  
 719 then by assumption (1)–(2) and by line 15, we infer  $|\Pi(a)| \geq T_{z-1}[a] + 1 = T_z[a] \geq |\Pi(a)|$ , as  
 720 desired. If  $\hat{a} \notin A'_{z-1}$ , then again by assumption (1)–(2) and by line 15, we infer  $|\Pi(a)| \geq T_{z-1}[a] =$   
 721  $T_z[a] \geq |\Pi(a)|$ , as desired as well.

722 Recall that we inferred that  $\hat{a} \in A'_z$ . Let  $(G, c)$  denote the network constructed in iteration  $z$ . By  
 723 Lemma 4,  $(A'_z, V'_z)$  is an obstruction for  $(G, c)$ . Let  $\hat{v}^* \in V'$  be the starting vertex with  $f(\hat{v}^*, t) = 0$ .  
 724 By Definition 3(iii), more than  $c(s, \hat{a}) = T_z[a]$  vertices from  $V'_z$  exist that have  $a$  as an in-neighbor.  
 725 By Construction 2(v), more than  $T_z[a] = |\Pi(a)|$  agents from  $V'_z$  consider  $(a, T_z[a])$  as one of the  
 726 most-preferred tuples among all  $(a', T_z[a'])$ . Hence, at least one of such agents is not assigned to  $a$   
 727 by  $\Pi$ .

728 Let  $\hat{v} \in V'_z$  be a vertex whose corresponding agent  $v$  considers  $(a, |\Pi(a)|)$  as one of the most  
 729 preferred tuples but is assigned to some other post  $a' \neq a$ . Then,  $(\hat{a}, \hat{v}) \in E(G)$ . To prevent  $v$  from  
 730 being envious (recall that no post is empty), we must have that  $(a', |\Pi(a')|) \succeq_v (a, |\Pi(a)|)$ .

731 We claim that  $\hat{a}' \in A'_z$  as well. Since  $(a, |\Pi(a)|)$  is one of the most-preferred tuples of  $v$  among  
 732 all  $(a', T_z[a'])$ , by previous paragraph and by congestion aversion, we infer that  $T_z[a'] \geq |\Pi(a')|$ .  
 733 If  $T_z[a'] > |\Pi(a')|$ , then by line 15, there must exist an iteration  $z' \in [z - 1]$  where  $\hat{a}' \in A'_{z'}$ ,  
 734 and  $T_{z'}[a'] = |\Pi(a')|$ , a contradiction to (1). Hence,  $T_z[a'] = |\Pi(a')|$ , implying that  $(a', T_z[a'])$  is  
 735 also one of the most preferred tuples of  $v$  among all  $(a'', T_z[a''])$ . By Construction 2(v), we have  
 736  $(\hat{a}', \hat{v}') \in E(G)$ , and by line 11, we have  $\hat{a}' \in A'_z$ , as desired.

737 By Definition 3(iii), we infer that more than  $c(a') = T_z[a'] = |\Pi(a')|$  vertices from  $V'_z$  have in-arcs  
 738 from  $\hat{a}'$ . By Construction 2(v), more than  $c(a') = T_z[a'] = |\Pi(a')|$  agents consider  $(a', |\Pi(a')|)$  as  
 739 one of the most preferred tuples among all  $(p, T[p]), p \in A$ .

740 Analogously, we can again find another vertex  $\hat{v}' \in V'_z$  such that  $v'$  considers  $(a', |\Pi(a')|)$  as one  
741 of the most preferred tuples among all  $(p, T_z[p]), p \in A$ , but is assigned to some other post  $a'' \neq a'$   
742 with  $\hat{a}'' \in A'_z$  and  $T_z[a''] = |\Pi(a'')|$ . By repeating this argument, we infer that every vertex  $\hat{\alpha} \in A'_z$   
743 has  $T_z[\alpha] = |\Pi(\alpha)|$ . By Definition 3(iv), we have that  $|V'_z| > \sum_{\hat{\alpha} \in A'_z} c(s, \hat{\alpha}) = \sum_{\hat{\alpha} \in A'_z} T_z[\alpha] =$   
744  $\sum_{\hat{\alpha} \in A'_z} |\Pi(\alpha)|$ . So there must be a vertex  $\hat{\mu} \in V'_z$  such that  $\mu$  is assigned to a post  $b$  with  $\hat{b} \notin A'_z$ .  
745 By line 11 and Construction 2(v), let  $\hat{\alpha} \in A'_z$  with  $(\hat{\alpha}, \hat{\mu}) \in E(G)$  such that  $(\alpha, T_z[\alpha])$  is a most  
746 preferred tuple of  $\mu$  among all tuples  $(p, T_z[p]), p \in A$ .

747 By our previous argument, we have that  $T_z[\alpha] = |\Pi(\alpha)|$ . By CP, we have that  $(b, |\Pi(b)|) \succeq_v$   
748  $(\alpha, |\Pi(\alpha)|)$ . Since  $(\alpha, T_z[\alpha])$  is a most preferred tuple of  $\mu$  among all tuples  $(p, T_z[p]), p \in A$ , we  
749 further infer that  $T_z[b] \geq |\Pi(b)|$ .

750 Since  $b \notin A'_z$ , meaning by line 11 that  $(\hat{b}, \hat{\mu}) \notin E(G)$ , by Construction 2(v), we further infer that  
751  $|\Pi(b)| < T_z[b]$ . By line 15, there must exist an iteration  $z' \in [z - 1]$  with  $T_{z'}[b] = |\Pi(b)|$  and  $T_{z'}[b]$   
752 was incremented. This is a contradiction to (1) however.  $\square$

## 753 B.7 Proof of Lemma 6

754 **Lemma 6** ( $\star$ ). *If  $\Pi$  is an assignment returned in line 7, then  $\Pi$  is CP and has no empty post.*

755 *Proof.* Let  $z$  be the integration and  $f$  be the perfect flow based on which  $\Pi$  is computed in line 7. By  
756 the definition of perfectness (see Definition 2), the value of  $f$  equals the number  $|V|$  of agents. This  
757 means that  $\sum_{a \in A} |\Pi(a)| = |V|$ . By the capacity constraints, we obtain that  $|V| = \sum_{a \in A} |\Pi(a)| \leq$   
758  $\sum_{a \in A} T_z[a] \leq |V|$ , the last inequality holds due to the while-loop-condition in line 4. Hence, for  
759 each post  $a \in A$  we must have that  $|\Pi(a)| = T_z[a]$  since  $|\Pi(a)| \leq T_z[a]$  holds by the capacity  
760 constraints in Construction 2(iii).

761 This implies that  $\Pi(a) \neq \emptyset$  since  $T_z[a] \geq 1$ . Hence, to show that  $\Pi$  is CP, it suffices to show that for  
762 each agent  $v$  that is assigned to a post  $a$  and for each post  $a'$  with  $a' \neq a$  it holds that  $(a, |\Pi(a)|) \succeq_v$   
763  $(a', |\Pi(a')|)$ . Towards a contradiction, suppose that  $(a', |\Pi(a')|) \succ_v (a, |\Pi(a)|)$ . By the reasoning  
764 above, it follows that  $(a', T_z[a']) \succ_v (a, T_z[a])$ , a contradiction to Construction 2(v).  $\square$

## 765 B.8 Continuation of the proof of Theorem 1

766 **Theorem 1** ( $\star$ ). *Algorithm 1 correctly decides whether an instance has a CP assignment in  $O(m^2 \cdot$   
767  $(n + m)^2)$  time, where  $m$  and  $n$  denote the number of posts and agents, respectively.*

768 It remains to analyze the running time. The main body of the algorithm is a for-loop (line 1) and  
769 has at most  $m$  iterations. In each iteration  $k$ , the algorithm constructs a new instance  $I$  according  
770 to Construction 1. Note that  $I$  has  $O(n + m)$  agents and  $O(m)$  posts, and it can be constructed in  
771  $O((n + m)^2)$  time since each agent has  $O(n + m)$  tuples in his preference list. Then, we continue  
772 with the big **while**-loop in lines 4–16. If we can show the **while**-loop run in  $O(m \cdot (n + m)^2)$  time,  
773 we obtain our desired running time of  $O(m^2 \cdot (n + m)^2)$ .

774 So, it remains to analyze the **while**-loop. In line 3, initializing the table  $T$  needs  $O(m)$  time.  
775 The while-loop (lines 4–15) runs at most  $n$  times since no table entries are ever decreased and in  
776 each iteration at least one table entry is increased by one. For each iteration, we first construct a  
777 network  $N = (G, c)$  based on  $(I, T)$ ; see Construction 2. The directed graph  $G$  has  $O(n + m)$   
778 vertices and  $O(m \cdot n)$  arcs, and each capacity value is in  $O(n)$ . Hence, constructing the network  
779 needs  $O(m \cdot n)$  time.

780 Afterwards, there are three phases. The first phase (lines 5–7) finds a maximum flow for  $N$  and  
781 checks whether its value is  $|V|$ . Computing a maximum flow can be done in  $O(m \cdot n)$  time and  
782 comparing two values needs constant time. Hence, the first phase needs  $O(m \cdot n)$  time.

783 The second phase (lines 8–14) finds an obstruction  $(A', V')$  by first finding a vertex  $\hat{v}^*$  with  $f(\hat{v}^*, t) =$   
784  $0$ . This can be done in  $O(1)$  time if we store such information when we compare the value of the  
785 flow with  $|V|$  in the first phase. Hence, the initialization of  $V'$  and  $A'$  needs  $O(1)$  time. Then, the  
786 algorithm goes to the repeat-loop in lines 10–14. To analyze the running time of this loop, we observe  
787 that there are  $O(m \cdot n)$  arcs between  $A'$  and  $V'$  and each arc only needs to be checked at most once  
788 during the whole loop (line 11). Adding new vertices to  $V'$  can be done in  $O(m \cdot n)$  time as well

789 since for each newly added alternative  $\hat{a}$  there are at most  $n$  vertices  $\hat{v}$  from  $\hat{V}$  with positive flow  
 790 from  $\hat{a}$  to  $\hat{v}$ . Hence, the repeat-loop needs  $O(m \cdot n)$  time.

791 It is straightforward that the last phase (lines 15–15) runs in  $O(m)$  time. Summarizing, we obtain  
 792 that the desired  $O(m \cdot n^2)$  time for the **while**-loop.

## 793 C Additional Material for Section 4

### 794 C.1 Correctness of the Construction in the Proof of Theorem 2

795 **Theorem 2** (★). EF+TG is NP-complete; hardness holds even if there are no ties.

796 *Proof of the correctness of the construction.* One can verify that the constructed preferences do not  
 797 contain ties. Due to TG, the maximum congestions of the agents are depicted in the following table,  
 798 where  $v_i$  is an element-agent with  $u_i$  appearing in  $C_1, C_2, C_m$ :

|           | $a_1$ | $a_2$ | $a_3$ | $\dots$ | $a_m$ | $b_1$     | $b_2$         |
|-----------|-------|-------|-------|---------|-------|-----------|---------------|
| 799 $v_i$ | 3     | 3     | 0     | $\dots$ | 3     | 0         | $3n + 4m - 9$ |
| $p_z$     | 2     | 2     | 2     | $\dots$ | 2     | $3n + 2m$ | 0             |
| $q_z$     | 0     | 0     | 0     | $\dots$ | 0     | $3n + 2m$ | $2m$          |

800 **Correctness.** It remains to show the correctness, i.e.,  $I$  has an exact cover if and only if  $I'$  admits an  
 801 EF and TG assignment.

802 For the “only if” part, let  $J \subseteq [m]$  denote an exact cover for  $I$ . Then, we claim that the following  
 803 assignment  $\Pi$  is EF+TG:

- 804 – For each  $j \in J$ , let  $\Pi(a_j) = \{v_i \mid u_i \in C_j\}$ .
- 805 – For each  $j \in [m] \setminus J$ , let  $\Pi(a_j) = \emptyset$ .
- 806 – Let  $\Pi(b_1) = \{p_j \mid j \in [2m]\}$  and  $\Pi(b_2) = \{q_j \mid j \in [2m]\}$ .

807 Since each set-post contains either zero or three agents, no dummy agent envies any element-agent.  
 808 The dummy agents also do not envy each other due to their preferences. Similarly, no two element-  
 809 agents envy each other and no element-agent envies any dummy agent since he does not like  $b_1$  or  $b_2$   
 810 more.

811 For “if” part, let  $\Pi$  be an EF and TG assignment for the constructed instance. We aim at showing  
 812 that the set-posts that are assigned element-agents constitute an exact cover. To this end, let  $J = \{j \mid$   
 813  $\exists v_i \text{ with } v_i \in \Pi(a_j)\}$ . We first show two claims.

814 **Claim C.1.1.** For each set-post  $a_j$  it holds that  $|\Pi(a_j)| \in \{0, 3\}$ .

815 *Proof.* Since there are  $2m$  dummy agents  $\{p_1, p_2, \dots, p_{2m}\}$ , but there are only  $m$  set-posts, at least  
 816 one dummy agent, say  $p_z$ , is not assigned to a set-post alone. Hence, for every set-post  $a_j$ , it holds  
 817 that  $|\Pi(a_j)| \neq 1$  since otherwise  $p_z$  would envy the agent that is assigned to  $a_j$ . Since the maximum  
 818 congestion for every set-post is 3, we further infer that  $|\Pi(a_j)| \in \{0, 2, 3\}$  holds for every set-post  $a_j$ .  
 819 In particular, this implies that no dummy agent  $p_z$  with  $1 \leq z \leq 2m$  is assigned to a set-post alone.

820 Towards a contradiction, suppose that there exists a set-post  $a_j$  with  $|\Pi(a_j)| \notin \{0, 3\}$ . This implies  
 821 that  $|\Pi(a_j)| = 2$ . Then, every dummy agent  $p_z$  with  $1 \leq z \leq 2m$  is to be assigned a set-post since  
 822 otherwise he would envy the two agents that are assigned to  $a_j$ . Since there are exactly  $2m$  dummy  
 823 agents  $p_1, \dots, p_{2m}$ , this means that every set-post  $a_x$ ,  $x \in [m]$ , must have  $|\Pi(x)| = 2$ . Then, no other  
 824 agent can be assigned to the set-post. However, all element-agents will envy all  $p_i$ 's, a contradiction.  
 825 This concludes the proof. (end of the proof of Claim C.1.1  $\diamond$ )

826 By Claim C.1.1, we know that each set-post is assigned either zero or three agents. Next, we show  
 827 that every element-agent  $v_i$  is assigned to an *acceptable* set-post.

828 **Claim C.1.2.** For each element-agent  $v_i$  it holds that  $\Pi(v_i) \in \{a_j \mid j \in [m] \text{ and } u_i \in C_j\}$ .



829 *Proof.* Suppose this is not true, and by TG let  $v_i$  denote an element-agent that is assigned to  $b_2$ ;  
830 note that  $v_i$  does not find  $b_1$  acceptable. Since there are  $2m$  dummy agents  $q_z$  each with con-  
831 gestion  $2m$  for  $b_2$ , at least one of them is *not* assigned to  $b_2$ . This agent envies  $v_i$ , a contradic-  
832 tion. (end of the proof of Claim C.1.2  $\diamond$ )

833 Claim C.1.2 implies that  $J$  is a set cover, while Claim C.1.1 implies that  $|J| \leq n$ . Altogether we  
834 conclude that  $J$  is an exact cover.  $\square$

## 835 C.2 Proof of Theorem 3

836 **Theorem 3** ( $\star$ ). EF+TG is FPT with respect to the number  $n$  of agents and the number  $m$  of posts,  
837 respectively.

838 *Proof.* We first consider the parameter  $n$ . Let  $I = (A, V, (\succeq_v)_{v \in V})$  be an instance of CONGESTED  
839 ASSIGNMENT. Due to TG, each agent is assigned to one of his first  $n$  tuples. Hence, for each  
840 agent  $v_i \in V$ , we guess (by brute-force searching) which of his first  $n$  tuples that  $v_i$  is “assigned”  
841 to, i.e.,  $(a, d)$ . After assigning all the agents, we check in linear time whether this results in a valid  
842 assignment, i.e., if we  $v_i$  “assign”  $(a, d)$ , then there must be exactly  $d$  agents that are guessed to be  
843 “assigned” to  $(a, d)$ . This check can be done in  $O(n^2 + m)$  time. We abandon the current guess if it  
844 does not give a valid assignment; otherwise we proceed to check EF in  $O(n^2)$  time.

845 Since there are  $n$  agents, each with  $n$  choices, the whole procedure can be done in  $O(n^n \cdot (n^2 + m))$   
846 time, which is an FPT time with respect to  $n$ .

847 Now, we consider the parameter  $m$ . Let  $I = (A, V, (\succeq_v)_{v \in V})$  be an instance of CONGESTED  
848 ASSIGNMENT. We guess (by brute-force searching) the set of empty posts  $A' \subseteq A$  in the sought  
849 solution. Then, we modify the preference list  $\succeq_v$  of each agent  $v$  as follows: First, truncate  $\succeq_v$  by  
850 removing all tuples  $(a, d)$  with ranks are higher than  $n$ ; then, remove all tuples  $(a', d')$  with  $a'$  in  $A'$ .  
851 Denote the new preference list as  $\succeq'_v$ . Let  $I' = (V, A \setminus A', (\succeq'_v)_{v \in V})$  denote the modified instance.

852 Since for assignments with only filled posts, CP and EF are equivalent, we infer that  $I$  admits an EF  
853 and TG assignment where all posts in  $A'$  are empty and the rest is non-empty if and only if  $I'$  admits  
854 CP assignment where all posts are non-empty. The latter problem can be checked in polynomial  
855 time via lines 3–16 in Algorithm 1. The running time depends on the running time of the **while**-loop,  
856 which is  $m(n + m)^2$  time. See the proof in Appendix B.8 for more details. Since there are  $2^m$  subsets  
857 of empty posts to check, the overall running time is  $2^m \cdot m \cdot (n + m)^2$ , which is an FPT time with  
858 respect to  $m$ .  $\square$

859 **Clique.** The following graph problem is W[1]-complete with respect to the clique size  $h$  [20]. We  
860 will use it to show W[1]-hardness for finding a a maximally competitive assignment.

CLIQUE

861 **Input:** An undirected graph  $G=(U, E)$ , an integer  $h \geq 0$ .

**Question:** Does  $G$  admit a *clique* of size  $h$ , i.e., a size- $h$  subset  $U' \subseteq U$  which induces a  
complete subgraph?

## 862 C.3 Proof of Theorem 4

863 **Theorem 4** ( $\star$ ). MAXCP+TG is W[1]-hard and in XP with respect to the number  $t$  of unsatisfied  
864 agents. The W[1]-hardness holds even if there are no ties.

865 *Proof.* We first show the W[1]-hardness by providing a parameterized reduction from the CLIQUE  
866 problem.

867 Let  $I = (G = (U, E), h)$  denote an instance of CLIQUE with  $U = \{u_1, \dots, u_{|U|}\}$  and  $E =$   
868  $\{e_1, \dots, e_{|E|}\}$ . We create a MAXCP+TG instance  $I' = (A, V, (\succeq_v)_{v \in V}, t)$  as follows. Let  $t =$   
869  $h + h(h - 1)$ . We will show that the agents corresponding to the vertices and edges of a size- $h$  clique  
870 are the only unsatisfied agents.

871 – For each vertex  $u_i \in U$ , create a *vertex-post*  $a_i$ , a *vertex-agent*  $w_i$ , and  $h - 1$  copies of  $w_i$ , denoted  
872 as  $\tilde{w}_i^z$  with  $z \in [h - 1]$ .

- 873 – For each edge  $e_\ell \in E$  with  $e_\ell = \{u_i, u_j\}$ , create an *edge-post*  $b_\ell$  and three *edge-agents*  $e_\ell^*$ ,  $e_\ell^i$ , and  
874  $e_\ell^j$ .
- 875 – Create  $L$  dummy agents  $x_1, \dots, x_L$  with  $L = |U|((h-2) + (|U| - h - 1) + (h(h-1) - 1) +$   
876  $(|E| - \binom{h}{2} - 1) + (t+1)$ .
- 877 – Create five auxiliary posts  $a_0, \tilde{a}_0, b_0, y, c_0$ . Post  $y$  shall accommodate all  $L$  dummy agents, while  
878  $c_0$  is a “blocker” making sure that agents are assigned to the desired posts.

879 Let  $V = W \cup \bigcup_{u_i \in U} \tilde{W}_i \cup \{e_\ell^*, e_\ell^i, e_\ell^j \mid e_\ell \in E, e_\ell = \{u_i, u_j\}\} \cup \{x_i \mid i \in [L]\}$ , and  
880  $\mathcal{A} = \{a_i \mid u_i \in U\} \cup \{b_\ell \mid e_\ell \in E\} \cup \{a_0, \tilde{a}_0, b_0, y, c_0\}$ , where  $W = \{w_i \mid u_i \in U\}$  and  
881  $\tilde{W}_i = \{\tilde{w}_i^z \mid z \in [h]\}$ . Let  $n = |V|$ .

882 **Preferences.** We state the preferences of the agents, restricted to the first  $n$  tuples. Here,  
883  $\langle \alpha, s, t \rangle = (\alpha, s) \succ (\alpha, s+1) \succ \dots \succ (\alpha, t)$  depicts the preference list on tuples for post  $\alpha$  and  
884 congestions ranging between  $s$  and  $t$ . Note that we also briefly explain the main purpose of these  
885 preferences in italicized text.

- 886 – The dummy agent  $x_i$  with  $i \in [L]$  has the following preference list:

$$x_i: \langle a_1, 1, h-2 \rangle \succ \langle a_2, 1, h-2 \rangle \succ \dots \succ \langle a_{|U|}, 1, h-2 \rangle \succ \langle a_0, 1, |U| - h - 1 \rangle \succ$$

$$\langle \tilde{a}_0, 1, h(h-1) - 1 \rangle \succ \langle b_0, 1, |E| - \binom{h}{2} - 1 \rangle \succ \langle y, 1, L \rangle \succ \langle c_0, 1, n + (t+1) - 2L \rangle.$$

887 *The dummy agents shall ensure some minimum number of agents assigned to each post (except  $b_\ell$*   
888 *and  $y$ ): At least  $h-1$ ,  $|U|-h$ ,  $h(h-1)$ , and  $|E| - \binom{h}{2}$  agents are to be assigned to  $a_i$  ( $i \in [|U|]$ ),*  
889  *$a_0$ ,  $\tilde{a}_0$ , and  $b_0$ , respectively. The reason is that since at least  $t+1$  dummy agents are to be assigned*  
890 *to  $y$  or  $c_0$ , they would envy the agents assigned to a post if its congestion is less than or equal*  
891 *to the maximum congestion of  $x_i$  to that post, which is not possible for a yes instance. Indeed,*  
892 *the dummy agents can only be assigned to  $y$ .*

- 893 – The vertex-agent  $w_i$  with  $i \in [|U|]$  has the following preference list:

$$w_i: \langle a_0, 1, |U| - h - 1 \rangle \succ \langle a_i, 1, h-2 \rangle \succ (a_0, |U| - h) \succ (a_i, h-1) \succ (a_i, h) \succ \langle c_0, 1, n - |U| \rangle.$$

894 *We will show that exactly  $|U| - h$  vertex-agents  $w_i$  are assigned to  $a_0$ . Consequently, there remain*  
895  *$h$  vertex-agents  $v_i$  that are assigned to  $a_i$ . They shall correspond to the clique-vertices if  $G$  admit*  
896 *a size- $h$  clique.*

- 897 – For each  $i \in [|U|]$ , all copy-agents  $\tilde{w}_i^z$  with  $z \in [h-1]$  of the vertex-agent  $w_i$  have the same  
898 preference list:

$$\tilde{w}_i^z: \langle \tilde{a}_0, 1, h(h-1) - 1 \rangle \succ \langle a_i, 1, h-1 \rangle \succ (\tilde{a}_0, h(h-1)) \succ \langle c_0, 1, n - (h+1)(h-1) \rangle.$$

899 *The copy-agents shall ensure that all  $\tilde{w}_i^z$ ,  $z \in [h-1]$ , are jointly assigned to either  $\tilde{a}_0$  or  $a_i$ . If*  
900 *they are assigned to  $a_i$ , then no other agent (including  $w_i$ ) can be assigned to  $a_i$ . This corresponds*  
901 *to the case that the vertex  $u_i$  is not in the clique.*

- 902 – The edge-agents  $e_\ell^*$ ,  $e_\ell^i$  and  $e_\ell^j$  with  $e_\ell = \{u_i, u_j\}$  have the following preference lists:

$$e_\ell^*: \langle b_0, 1, |E| - \binom{h}{2} - 1 \rangle \succ (b_\ell, 1) \succ (b_0, |E| - \binom{h}{2}) \succ (b_\ell, 2) \succ \langle c_0, 1, n - (|E| - \binom{h}{2}) - 2 \rangle.$$

$$e_\ell^i: (b_\ell, 1) \succ (b_\ell, 2) \succ \langle a_i, 1, h \rangle \succ \langle c_0, 1, n - h - 2 \rangle.$$

$$e_\ell^j: (b_\ell, 1) \succ (b_\ell, 2) \succ \langle a_j, 1, h \rangle \succ \langle c_0, 1, n - h - 2 \rangle.$$

903 *Note that  $e_\ell^*$  can only be assigned to  $b_\ell$  or  $b_0$ , and  $e_\ell^i$  (resp.  $e_\ell^j$ ) only to  $a_i$  (resp.  $a_j$ ) or  $b_\ell$ . If*  
904  *$e_\ell^*$  is assigned to  $b_\ell$  and does not envy other agents, then no other agent can be assigned to  $b_\ell$ ,*  
905 *as otherwise at least  $|E| - \binom{h}{2} + 1$  agents must be assigned to  $b_0$ , which is impossible due to*  
906 *top-guarantees. Therefore, if  $e_\ell^*$  is assigned to  $b_\ell$ , then  $e_\ell^i$  and  $e_\ell^j$  have to be assigned to  $a_i$  and*  
907  *$a_j$ , respectively. We will show that  $e_\ell^*$  cannot be unsatisfied, and having  $e_\ell^i$  and  $e_\ell^j$  assigned to*  
908  *$a_i$  and  $a_j$ , respectively, corresponds to having the edge  $e_\ell$  in a size- $h$  clique.*

909 The maximum congestions of the agents are depicted in Table 1.

910 **Correctness.** Clearly, the construction can be done in polynomial time and no agent has ties in  
911 his preference list. It remains to show the correctness, i.e.,  $I$  has a clique of size  $h$  if and only if  
912  $I'$  admits a TG assignment with  $t = h + h(h-1)$  agents being unsatisfied.

|                     | $a_1$   | $\dots$ | $a_{ U }$ | $a_0$         | $\tilde{a}_0$  | $b_\ell$ | $b_0$                    | $y$ | $c_0$                          |
|---------------------|---------|---------|-----------|---------------|----------------|----------|--------------------------|-----|--------------------------------|
| $w_1$               | $h$     | $0$     | $0$       | $ U  - h$     | $0$            | $0$      | $0$                      | $0$ | $n -  U $                      |
| $\vdots$            | $0$     | $h$     | $0$       | $ U  - h$     | $0$            | $0$      | $0$                      | $0$ | $n -  U $                      |
| $w_{ U }$           | $0$     | $0$     | $h$       | $ U  - h$     | $0$            | $0$      | $0$                      | $0$ | $n -  U $                      |
| $\tilde{w}_1^z$     | $h - 1$ | $0$     | $0$       | $0$           | $h(h - 1)$     | $0$      | $0$                      | $0$ | $n - h^2 + 1$                  |
| $\vdots$            | $0$     | $h - 1$ | $0$       | $0$           | $h(h - 1)$     | $0$      | $0$                      | $0$ | $n - h^2 + 1$                  |
| $\tilde{w}_{ U }^z$ | $0$     | $0$     | $h - 1$   | $0$           | $h(h - 1)$     | $0$      | $0$                      | $0$ | $n - h^2 + 1$                  |
| $e_\ell^*$          | $0$     | $0$     | $0$       | $0$           | $0$            | $2$      | $ E  - \binom{h}{2}$     | $0$ | $n - ( E  - \binom{h}{2}) - 2$ |
| $e_\ell^i$          | $h$     | $0$     | $0$       | $0$           | $0$            | $2$      | $0$                      | $0$ | $n - h - 2$                    |
| $e_\ell^j$          | $0$     | $0$     | $h$       | $0$           | $0$            | $2$      | $0$                      | $0$ | $n - h - 2$                    |
| $x_z$               | $h - 2$ | $h - 2$ | $h - 2$   | $ U  - h - 1$ | $h(h - 1) - 1$ | $0$      | $ E  - \binom{h}{2} - 1$ | $L$ | $n + (t + 1) - 2L$             |

Table 1: Maximum congestions of the agents constructed for Theorem 4. For an illustration, we assume that  $e_\ell = \{u_1, u_{|U|}\}$ .

**The “only if” part.** Let  $\mathcal{C} \subseteq U$  denote an  $h$ -clique for  $I$ . Let  $E^{\mathcal{C}} \subseteq E$  denote the edge set associated with  $\mathcal{C}$ , i.e.,  $E^{\mathcal{C}} = \{e_\ell = \{u_i, u_j\} \mid u_i, u_j \in \mathcal{C}\}$ . Then, we claim that the following assignment  $\Pi$  is a TG assignment with  $t$  unsatisfied agents.

- For each  $u_i \in \mathcal{C}$ , assign  $w_i$  to  $a_i$ , and assign  $\tilde{w}_i^z$  with  $z \in [h - 1]$  to  $\tilde{a}_0$ .
- For each  $u_i \notin \mathcal{C}$ , assign  $\tilde{w}_i^z$  with  $z \in [h - 1]$  to  $a_i$ , and assign  $w_i$  to  $a_0$ .
- For each  $e_\ell = \{u_i, u_j\} \in E^{\mathcal{C}}$ , assign  $e_\ell^i$  to  $a_i$ ,  $e_\ell^j$  to  $a_j$ , and  $e_\ell^*$  to  $b_\ell$ .
- For each  $e_\ell = \{u_i, u_j\} \notin E^{\mathcal{C}}$ , assign  $e_\ell^i$  and  $e_\ell^j$  to  $b_\ell$ , and  $e_\ell^*$  to  $b_0$ .
- Assign  $x_z$  to  $y$  with  $z \in [L]$ .

Clearly,  $\Pi$  is TG with the following congestion vector.

**Observation 3.**  $\Pi$  is TG and satisfies the following.

- (i)  $|\Pi(a_0)| = |U| - h$ ,  $|\Pi(\tilde{a}_0)| = h(h - 1)$ ,  $|\Pi(b_0)| = |E| - \binom{h}{2}$ , and  $|\Pi(y)| = L$ .
- (ii) For each  $u_i \in \mathcal{C}$ , it holds that  $|\Pi(a_i)| = \{w_i, \tilde{w}_i^z \mid z \in [h - 1]\}$ .  
For each  $u_i \in U \setminus \mathcal{C}$ , it holds that  $|\Pi(a_i)| = \{\tilde{w}_i^z \mid z \in [h - 1]\}$ .
- (iii) For each  $e_\ell \in E$ , if  $e_\ell \in E^{\mathcal{C}}$ , then  $|\Pi(b_\ell)| = 2$ ; otherwise  $|\Pi(b_\ell)| = 1$ .

Let  $V' = \{w_i \mid u_i \in \mathcal{C}\} \cup \{e_\ell^i, e_\ell^j \mid e_\ell \in E^{\mathcal{C}} \text{ with } e_\ell = \{u_i, u_j\}\}$ . Note that  $|V'| = t$ . We aim to show that all agents except those from  $V'$  are satisfied. By the above observation, it is straightforward that every dummy agent  $x_z$  is satisfied, every agent that *does not* correspond to the clique vertices is satisfied, and the copies  $\tilde{w}_i^z$  of all vertex-agents are also satisfied. It remains to consider the edge-agents that are not in  $V'$ . Let  $e_\ell \in E$  with  $e_\ell = \{u_i, u_j\}$ . Clearly, if  $e_\ell \notin E^{\mathcal{C}}$ , then the two edge-agents  $e_\ell^i$  and  $e_\ell^j$  are satisfied since they are assigned to their most preferred post. Agent  $e_\ell^*$  with  $e_\ell \notin E^{\mathcal{C}}$  is also satisfied since he is assigned to  $b_0$  with congestion  $|E| - \binom{h}{2}$  which is better than  $(b_\ell, 2)$ . If  $e_\ell \in E^{\mathcal{C}}$ , then agent  $e_\ell^*$  is satisfied since he is assigned to  $b_\ell$  alone which is better than  $(b_0, |E| - \binom{h}{2})$ . Hence, only the agents in  $V'$  are unsatisfied. Since  $|V'| = t$ , this concludes the proof for the “only if” direction.

**The “if” part.** Let  $\Pi$  be a TG assignment with at most  $t$  unsatisfied agents. We aim to show that the following vertex subset  $\mathcal{C}$  is a size- $h$  clique:  $\mathcal{C} = \{u_i \mid |\Pi(a_i)| \geq h\}$ . Before we show this, we observe the following regarding the congestions and assignments of the posts.

- Claim C.3.1.** (1)  $|\Pi(a_0)| = |U| - h$ ,  $|\Pi(\tilde{a}_0)| = h(h - 1)$ , and  $|\Pi(b_0)| = |E| - \binom{h}{2}$ .  
(2) For each  $u_i \in U$ , it holds that  $|\Pi(a_i)| \in \{h - 1, h\}$ .  
(3) For each  $e_\ell \in E$ , it holds that  $|\Pi(b_\ell)| \leq 2$ .  
(4)  $\Pi(a_0) \subseteq \{w_i \mid u_i \in U\}$ ,  $\Pi(\tilde{a}_0) \subseteq \{\tilde{w}_i^z \mid i \in [|U|], z \in [h - 1]\}$ , and  $\Pi(b_0) \subseteq \{e_\ell^* \mid e_\ell \in E\}$ .  
(5) All edge-agents  $E^* = \{e_\ell^* \mid e_\ell \in E\}$  are satisfied.

*Proof.* We show the first two statements together by considering the dummy agents.

Since  $\Pi$  is TG and the maximum congestion of dummy  $x_z$  for  $a_0, \tilde{a}_0, b_0$ , and  $a_i$  with  $i \in [|U|]$  are  $|U| - h - 1, h(h - 1) - 1, |E| - \binom{h}{2} - 1$ , and  $h - 2$ , respectively, we infer by simple calculation that there

are more than  $t$  dummy agents who are assigned to  $y$  or  $c_0$ . Since  $\Pi$  does not have more than  $t$  unsatisfied agents, this further implies that there is at least one satisfied dummy agent  $x_z$  who is assigned to  $y$  or  $c_0$ . By his preferences, every tuple that he prefers to  $(y, t + 1)$  must have congestion that exceeds his maximum durable congestion. This implies that  $|\Pi(a_0)| \geq |U| - h$ ,  $|\Pi(\tilde{a}_0)| \geq h(h - 1)$ , and  $|\Pi(b_0)| \geq |E| - \binom{h}{2}$ , for  $|\Pi(a_i)| \geq h - 1$ . Since no agent allows more than the aforementioned congestions (except for  $a_i$ ), we further infer that  $|\Pi(a_0)| = |U| - h$ ,  $|\Pi(\tilde{a}_0)| = h(h - 1)$ , and  $|\Pi(b_0)| = |E| - \binom{h}{2}$ . For  $a_i$ , since the maximum congestion of any agent for  $a_i$  is  $h$ , we infer that  $h - 1 \leq |\Pi(a_i)| \leq h$ .

Statement (3) is straightforward by observing the maximum congestion of any agent towards  $b_\ell$  is two.

The first part of statement (4) follows from the fact that the only agents that have  $(a_0, |U| - h)$  in their top  $n$  choices are the vertex-agents. Similarly, we can show that the other parts of statement (4) are also correct.

To show statement (5), let us analyze which agents are unsatisfied. To this end, define  $W' = \{w_i \in W \mid w_i \notin \Pi(a_0)\}$ . By statements (1) and (4), we infer that  $|W'| = h$ .

Further, every agent  $w_i$  in  $W'$  is unsatisfied since by statement (2) that  $|\Pi(a_i)| \geq h - 1$ , any agent not assigned to  $a_0$  will envy those that are assigned to  $a_0$ . This implies that at most  $2\binom{h}{2}$  agents other than  $W'$  can be unsatisfied.

By statement (2), partition the posts  $\{a_i \mid u_i \in U\}$  into  $A_1$  and  $A_2$  with  $A_1 = \{a_i \mid u_i \in U \wedge |\Pi(a_i)| = h - 1\}$  and  $A_2 = \{a_i \mid u_i \in U \wedge |\Pi(a_i)| = h\}$ . Note that by the top-guarantees, every post  $a_i$  from  $A_2$  can only be assigned vertex-agents  $w_i$  or edge-agent  $e_\ell^i$  for some edge  $e_\ell \in E$  with  $u_i \in e_\ell$ . However, this implies that every agent assigned to post  $a_i \in A_2$  is unsatisfied since  $w_i$  prefers  $(a_0, |U| - h)$  to  $(a_i, h - 1)$  and every edge-agent  $e_\ell^i$  (with  $u_i \in e_\ell$ ) prefers  $(b_\ell, 2)$  to  $(a_i, h)$ ; recall by statements (1) and (3) that  $|\Pi(a_0)| = |U| - h$  and  $|\Pi(b_\ell)| \leq 2$ . This further implies that  $|A_2| \leq h$  since  $t = h + h(h - 1) = h^2$  can be unsatisfied.

By statement (1), we have that  $|\Pi(\tilde{a}_0)| = h(h - 1)$ . Since every vertex-agent has  $h - 1$  copies, there are at least  $h$  vertices each of which has a copy-agent assigned to  $\tilde{a}_0$ . Since every copy-agent  $e_\ell^z$  corresponding to vertex  $u_i$  prefers  $(a_i, h - 1)$  to  $(\tilde{a}_0, h(h - 1))$ , it follows that at least  $h - |A_2|$  copy-agents will be unsatisfied, namely those whose corresponding vertex-post has congestion  $h - 1$ .

Since at most  $h$  vertex-agents and at most  $(|U| - h)(h - 1)$  copy-agents can be assigned to any vertex-post  $a_i$ , the number of edge-agents  $e_\ell^i$  that have to be assigned to some vertex-post  $a_i$  is at least

$$|A_1| \cdot (h - 1) + |A_2| \cdot h - (h + (|U| - h)(h - 1)) = h(h - 1) - (h - |A_2|).$$

Observe that each edge-agent  $e_\ell^i$  that is assigned to some vertex-post  $a_i$  is unsatisfied. This implies that at least  $h(h - 1) - (h - |A_2|)$  edge-agents are unsatisfied. Together with the  $h - |A_2|$  unsatisfied copy-agents, no more other agent can be unsatisfied. In other words, every edge-agent  $e_\ell^*$  must be satisfied, as desired. (end of the proof of Claim C.3.1  $\diamond$ )

Now, we are ready to show that  $\mathcal{C}$  is a clique of size  $h$ . We first show that  $\mathcal{C}$  has size  $h$ . Define  $W' = \{w_i \mid \Pi(w_i) \neq a_0\}$ . By the preferences of the vertex-agents and by Claim C.3.1(1),  $|W'| = h$  and every vertex-agent in  $W'$  is unsatisfied. By Claim C.3.1(1) and by the maximum congestions of the agents towards  $b_0$ , we infer that  $\Pi(b_0)$  consists of exactly  $\binom{|E| - \{h\}}{2}$  edge-agents  $e_\ell^*$ ,  $\ell \in [|E|]$ . By Claim C.3.1(5), every remaining edge-agent  $e_\ell^*$  that is *not* assigned to  $b_0$  must be assigned to the corresponding edge-post  $b_\ell$  alone. This implies that the remaining two edge-agents  $e_\ell^i$  and  $e_\ell^j$  with  $e_\ell = \{u_i, u_j\}$  are not assigned to  $b_\ell$  and hence unsatisfied; they both envy  $e_\ell^*$ . Define  $E' = \{e_\ell^i, e_\ell^j \mid \Pi(e_\ell^*) = b_\ell\}$ . Then,  $|E'| = h(h - 1)$  and it yields  $h(h - 1)$  unsatisfied edge-agents by Claim C.3.1(1). Together with the  $h$  unsatisfied vertex-agents in  $W'$ , we infer that every copy-agent  $\tilde{w}_i^z$  is satisfied. In particular, it means that for each copy-agent  $\tilde{w}_i^z$  that is assigned to  $\tilde{a}_0$  it must hold that  $|\Pi(a_i)| = h$ . Recall that there are at least  $h$  vertices  $u_i$  each of which has a copy-agent assigned to  $\tilde{a}_0$ . This further implies that there are at least  $h$  vertex-posts that each have congestion  $h$ , that is  $|\mathcal{C}| = h$ .

It remains to show that  $\mathcal{C}$  is a clique. Let  $E'' = \{e_\ell \mid e_\ell^i \in \Pi(a_i) \text{ for some } u_i \in \mathcal{C}\}$  be the set consisting of all edges whose corresponding edge-agents are assigned to some vertex-post. Clearly,  $|E''| \geq \binom{h}{2}$  since  $\mathcal{C} = h$ ; note that the equality holds only if  $\mathcal{C}$  induces a clique. Towards a contradiction, suppose that  $\mathcal{C}$  contains two vertices  $u_i$  and  $u_j$  that are not adjacent with each other. This implies that  $|E''| > \binom{h}{2}$ . Let us consider each edge  $e_\ell \in E''$  and let  $e_\ell = \{u_i, u_j\}$  with  $i < j$ .

By definition, at least one of the two edge-agents  $e_\ell^i$  and  $e_\ell^j$  is assigned to  $a_i$  and he is unsatisfied. We claim that both edge-agents are unsatisfied. Without loss of generality, assume that  $\Pi(e_\ell^i) = a_i$  and is unsatisfied. If  $e_\ell^j$  is assigned to vertex-post  $a_j$  or  $c_0$ , then he is unsatisfied as well. Otherwise,  $e_\ell^j$  is assigned to post  $b_\ell$  alone, making  $e_\ell^*$  unsatisfied which is not possible according to Claim C.3.1(5). Hence, both  $e_\ell^i$  and  $e_\ell^j$  are satisfied. Since there can be only  $h(h-1)$  unsatisfied edge-agents, we conclude that  $|E''| = \binom{h}{2}$ , as desired.

Now, we turn to the XP result. The idea is to guess the unsatisfied agents and the posts that they are assigned to, and replace them with dummies and run Algorithm 1 for the reduced instance. More precisely, we guess who are the unsatisfied agents in  $O(n^t)$  time; denoting the set of unsatisfied agents as  $V^* = \{v_1^*, \dots, v_t^*\}$ . For each  $V^*$ , we further guess which posts they are assigned to in  $O(m^t)$  time, denoted as  $A^* = \{a_1^*, \dots, a_t^*\}$  with  $a_z^*$  being the post that  $v_z^*$  will be assigned to and  $z \in [t]$ .

Then we create  $t$  dummy agents  $P = \{p_z \mid z \in [t]\}$  and set their preference list as  $p_z: (a_z^*, 1) \succ \dots \succ (a_z^*, n) \succ \dots$ . We replace the agents  $V^*$  with the dummies and use Algorithm 1 to solve the resulting instance. If Algorithm 1 returns no on the current guess, we proceed with the next guess; otherwise, let  $\Pi$  be CP assignment returned by Algorithm 1. It is straightforward that replacing each dummy  $P_z$  with  $v_z^*$  in the assignment yields a TG assignment with at most  $t$  unsatisfied agents.

The overall running time is  $O(n^t m^t)$ .  $\square$

#### C.4 Proof of Theorem 5

**Theorem 5** (\*). *MAXCP+TG is FPT with respect to  $n$ , and in XP with respect to  $m$ , where  $n$  and  $m$  denote the number of agents and the number of posts, respectively.*

*Proof sketch. Parameter  $n$ :* We first guess a subset  $V'$  of unsatisfied agents. Afterwards, similarly to Theorem 3, we guess for each satisfied agent  $V \setminus V'$  one of his first  $n$  tuples and check whether the  $|V \setminus V'|$  guesses yield a valid assignment  $\Pi_{V'}$  and store the number of unsatisfied agents. Finally, we select one valid  $\Pi_{V'}$  with fewest unsatisfied agents. The whole approach can be done in FPT time wrt.  $n$ .

*Parameter  $m$ :* For the XP-algorithm, we guess the congestion vector  $\vec{s}$  with  $\vec{s}[j] \in \{0, \dots, n\}$  and  $\sum \vec{s} = n$  and use the algorithm behind Lemma 2 to determine the minimum number of unsatisfied agents. The overall running time is  $n^m \cdot (m+n)^{O(1)}$ , which is XP wrt.  $m$ .  $\square$

#### C.5 Proof of Theorem 6

**Theorem 6** (\*). *Deciding whether an instance of CONGESTED ASSIGNMENT has an assignment with at most  $t$  unsatisfied agents is W[1]-hard with respect to  $t$ .*

*Proof.* We reduce from the W[1]-complete problem CLIQUE; the definition can be found ahead of Appendix C.3.

Let  $I = (G = (U, E), h)$  denote an instance of CLIQUE with  $U = \{u_1, \dots, u_{\hat{n}}\}$  and  $E = \{e_1, \dots, e_{\hat{m}}\}$  being the vertex set and edge set, respectively. Without loss of generality, we assume that  $\hat{n} > 3h + \binom{h}{2}$  and  $\hat{m} > 2h + 2\binom{h}{2}$  as the problem remains W[1]-hard in this case.

The idea is to construct an instance  $I' = (\mathcal{A}, V, (\succeq_v)_{v \in V})$  of CONGESTED ASSIGNMENT such that the unsatisfied agents correspond to the vertices and edges of a size- $h$  clique. We set the number of unsatisfied agents to  $t = 2h + \binom{h}{2}$ , and let  $L$  and  $R$  be two very large numbers such that  $L > 2t$  and  $R > (L+2) \cdot (\hat{n} + \hat{m}) + h$ . For the sake of brevity, let  $N = (L+2) \cdot (\hat{n} + \hat{m}) + 2R$ , and we will create exactly  $N$  agents.

##### Posts and agents.

- For each vertex  $u_i \in U$ , create one *vertex-post*  $a_i$  and  $L+2$  *vertex-agents*  $w_i, p_i, p_i^z, z \in [L]$ .
- For each edge  $e_\ell \in E$ , create one *edge-post*  $b_\ell$  and  $L+2$  *edge-agents*  $e_\ell, f_\ell^z, z \in [L+1]$ .
- Create  $2R$  dummy agents  $x_z, y_z, z \in [R]$ .
- Create 3 auxiliary posts  $a_0, b_0$ , and  $c_0$ .



1043 Let  $A = \{a_i \mid i \in [\hat{n}]\}$ ,  $B = \{b_\ell \mid \ell \in [\hat{m}]\}$ ,  $W = \{w_i \mid i \in [\hat{n}]\}$ ,  $P = \{p_i \mid i \in [\hat{n}]\}$ ,  $P_i = \{p_i^z \mid$   
 1044  $z \in [L], i \in [\hat{n}]\}$ ,  $F_\ell = \{f_\ell^z \mid z \in [L+1]\}$ ,  $X = \{x_z \mid z \in [R]\}$ , and  $Y = \{y_z \mid z \in [R]\}$ . Then,  
 1045 we set  $\mathcal{A} = A \cup B \cup \{a_0, b_0, c_0\}$ , and  $V = W \cup P \cup \bigcup_{i \in [\hat{n}]} P_i \cup E \cup \bigcup_{\ell \in [\hat{m}]} F_\ell \cup X \cup Y$ . In total, we

1046 have created  $\hat{n} + \hat{m} + 3$  posts and  $N$  agents.

1047 **Preferences.** For two numbers  $s, t \in [N]$  and post  $\alpha \in \mathcal{A}$ , let  $\langle \alpha, s, t \rangle = (\alpha, s) \succ (\alpha, s+1) \succ$   
 1048  $\dots \succ (\alpha, t)$  depict the preference list on tuples for post  $\alpha$  and congestions ranging between  $s$  and  $t$ .  
 1049 The notation “\*\*\*” refers to an arbitrary but congestion-averse preferences of the tuples that are not  
 1050 explicitly mentioned.

1051 (i) For each vertex  $u_i \in U$ , the vertex-agents  $w_i \in W$ ,  $p_i \in P$ , and  $p_i^z \in P_i$ ,  $z \in [L]$ , have the  
 1052 following preference lists:

$$\begin{aligned} w_i &: \langle a_0, 1, \hat{n} - h \rangle \succ \langle a_i, 1, L + 2 \rangle \succ \langle c_0, 1, N \rangle \succ *** \succ \langle b_0, 1, N \rangle \succ \langle a_0, \hat{n} - h + 1, N \rangle, \\ p_i &: \langle a_i, 1, L + 1 \rangle \succ \langle a_0, 1, \hat{n} - h \rangle \succ \langle a_i, L + 2 \rangle \succ \langle c_0, 1, N \rangle \succ *** \succ \langle b_0, 1, N \rangle \succ \langle a_0, \hat{n} - h + 1, N \rangle, \\ p_i^z &: \langle a_i, 1, L + 2 \rangle \succ \langle c_0, 1, N \rangle \succ *** \succ \langle b_0, 1, N \rangle \succ \langle a_0, 1, N \rangle. \end{aligned}$$

1053 (ii) For each edge  $e_\ell \in E$ , the edge-agents  $e_\ell$ ,  $f_\ell^z$ ,  $z \in [L+1]$ , have the following preference lists,  
 1054 where we assume  $e_\ell = \{u_i, u_j\}$ :

$$\begin{aligned} e_\ell &: \langle b_0, 1, \hat{m} - \binom{h}{2} \rangle \succ \langle b_\ell, 1, L + 2 \rangle \succ \langle c_0, 1, N \rangle \succ *** \succ \langle b_0, \hat{m} - \binom{h}{2} + 1, N \rangle \succ \langle a_0, 1, N \rangle. \\ f_\ell^z &: \langle b_\ell, 1, L + 1 \rangle \succ \langle a_i, 1, L + 1 \rangle \succ \langle a_j, 1, L + 1 \rangle \succ \langle b_\ell, L + 2 \rangle \succ \langle c_0, 1, N \rangle \succ *** \succ \\ &\quad \langle b_0, 1, N \rangle \succ \langle a_0, 1, N \rangle. \end{aligned}$$

1055 (iii) The preference lists of the dummy agent  $x_z \in X$  and  $y_z \in Y$  are as follows:

$$\begin{aligned} x_z &: \langle a_0, 1, \hat{n} - h - 1 \rangle \succ \langle a_1, 1, L \rangle \succ \dots \succ \langle a_{\hat{n}}, 1, L \rangle \succ \langle c_0, 1, 2R \rangle \succ \langle a_1, L + 1, N \rangle \succ \dots \succ \\ &\quad \langle a_{\hat{n}}, L + 1, N \rangle \succ \langle c_0, 2R + 1, N \rangle \succ *** \succ \langle b_0, 1, N \rangle \succ \langle a_0, \hat{n} - h, N \rangle \succ \langle a_0, 1, N \rangle. \\ y_z &: \langle b_0, 1, \hat{m} - \binom{h}{2} - 1 \rangle \succ \langle b_1, 1, L \rangle \succ \dots \succ \langle b_{\hat{m}}, 1, L \rangle \succ \langle c_0, 1, N \rangle \succ *** \succ \\ &\quad \langle b_0, \hat{m} - \binom{h}{2}, N \rangle \succ \langle a_0, 1, N \rangle. \end{aligned}$$

1056 This completes the construction of the instance  $I'$ , which can clearly be done in polynomial time.  
 1057 Note that it is also a parameterized reduction since the parameter  $t = 2h + \binom{h}{2}$  is a polynomial  
 1058 function in  $h$ . It remains to show the correctness, i.e.,  $I$  has a size- $h$  clique if and only if  $I'$  has an  
 1059 assignment with at most  $t$  unsatisfied agents.

1060 For the “**only if**” part, let  $U'$  be a clique of size  $h$ . We construct the following assignment  $\Pi$  and  
 1061 show that it has at most  $t$  unsatisfied agents.

- 1062 (1) For each vertex  $u_i \in U$ , assign all agents from  $P_i \cup \{p_i\}$  to  $a_i$ . Additionally assign  $w_i$  to  $a_i$  if  
 1063  $u_i \in U'$ ; otherwise assign  $w_i$  to  $a_0$ .
- 1064 (2) For each edge  $e_\ell \in E$ , assign all agents from  $F_\ell$  to  $b_\ell$ . Additionally assign  $e_\ell$  to  $b_\ell$  if  $e_\ell \subseteq U'$ ,  
 1065 i.e., both its endpoints are in  $U'$ ; otherwise assign  $e_\ell$  to  $b_0$ .
- 1066 (3) Assign all agents from  $X \cup Y$  to  $c_0$ .

1067 To see who is unsatisfied, let  $W' = \{w_i \in W \mid w_i \in \Pi(a_i)\}$ ,  $P' = \{p_i \in P \mid p_i \in \Pi(a_i)\}$ , and  
 1068  $E' = \{e_\ell \in E \mid e_\ell \in \Pi(b_\ell)\}$ . We claim that all agents but those from  $W' \cup P' \cup E'$  are satisfied.

1069 In the following, we say that a post  $\alpha$  is the *most preferred post* for agent  $q$  if every tuple that is contains  
 1070 a post other than  $\alpha$  is less preferred than  $(\alpha, |\Pi(\alpha)|)$ . Further, a tuple  $(\alpha, d)$  is a *most preferred*  
 1071 *feasible* tuple for agent  $q$  if every tuple  $(\alpha', d')$  that is preferred to  $(\alpha, d)$  has congestion  $|\Pi(\alpha')| > d'$ .

1072 Clearly, every agent in  $X \cup Y$  is satisfied since  $(c_0, 2R)$  is his most preferred *feasible* tuple. Every  
 1073 agent in  $(\bigcup_{i \in [\hat{n}]} P_i) \cup (W \setminus W') \cup (P \setminus P') \cup (E \setminus E')$  is satisfied since he is assigned to his most  
 1074 preferred post. Every agent  $f_\ell^z \in F_\ell$  is also satisfied since either he is assigned to his most preferred

1075 post (if  $e_\ell$  is not a “clique” edge) or  $|\Pi(a_i)| = |\Pi(a_j)| = L + 2$  so  $(b_\ell, L + 2)$  remains his most  
 1076 preferred feasible tuple. This concludes the proof for the “only if” direction.

1077 For the “if” direction, let  $\Pi$  denote an assignment with at most  $t$  unsatisfied agents. Before we  
 1078 construct a clique, let us analyze the preferences and  $\Pi$  would look like.

1079 **Claim C.5.1.**  $\Pi$  satisfies the following.

- 1080 (1)  $|\Pi(a_0)| = \hat{n} - h$  and  $|\Pi(b_0)| = \hat{m} - \binom{h}{2}$ .
- 1081 (2) Every agent from  $W$  that is not assigned to  $a_0$  is unsatisfied and every agent from  $E$  that is not  
 1082 assigned to  $b_0$  is unsatisfied.
- 1083 (3) For each  $a_i \in A$  we have that  $|\Pi(a_i)| \geq L + 1$  and for each  $b_\ell \in B$  we have that  $|\Pi(b_\ell)| \geq L + 1$ .
- 1084 (4) It holds that  $|\Pi(c_0)| \leq 2R$ .
- 1085 (5) For each  $a_i \in A$  we have that  $|\Pi(a_i)| \leq L + 2$  and for each  $b_\ell \in B$  we have that  $|\Pi(b_\ell)| \leq L + 2$ .

1086 *Proof. Statement (1):* The lower bounds are straightforward since all agents from  $W \cup X$  prefer  
 1087  $(a_0, \hat{n} - h - 1)$  to any other tuple that does not contain  $a_0$ : If  $|\Pi(a_0)| < \hat{n} - h$  would hold,  
 1088 then more than  $|W \cup X| - (\hat{n} - h) > R$  agents will be unsatisfied, which is not possible since  
 1089  $R > (L + 2) \cdot (\hat{n} + \hat{m}) > t$ . Similar reasoning shows that  $|\Pi(b_0)| \geq \hat{m} - \binom{h}{2}$  by considering the  
 1090 preferences of  $E \cup Y$ . Now, we show the upper bounds. Suppose, for the sake of contradiction,  
 1091 that  $|\Pi(a_0)| > \hat{n} - h$ . Then, since no agent considers  $(a_0, \hat{n} - h + 1)$  more valuable than any other  
 1092 tuple that does not contain  $a_0$ , all agents assigned to  $a_0$  are unsatisfied. Since we can assume that  
 1093  $\hat{n} > 3h + \binom{h}{2}$ , it follows that more than  $t$  agents will be unsatisfied, a contradiction. Similarly, since  
 1094 we have just shown that  $|\Pi(a_0)| \leq \hat{n} - h$ , from the remaining possible tuples, no agent considers  
 1095  $(b_0, \hat{m} - \binom{h}{2})$  more valuable than any tuple that does not contain  $b_0$  (except  $(a_0, \hat{n} - h + z)$ ,  $z \geq 1$ ,  
 1096 which is excluded). Consequently, by the fact that  $\hat{m} > 2h + 2\binom{h}{2}$ , we infer that  $|\Pi(b_0)| \leq \hat{m} - \binom{h}{2}$   
 1097 as otherwise all agents assigned to  $b_0$  are unsatisfied the number of which exceeds  $t$ .

1098 *Statement (2):* This statement follows directly from the previous statement and from the preferences  
 1099 of the agents in  $W \cup E$ .

1100 *Statement (3):* We show the lower bound by iterating through all  $i \in [\hat{n}]$ . By Statement (1), every  
 1101 agent in  $X \cup P_1 \cup \{p_1\}$  prefers  $(a_1, L)$  to every other tuple that does not contain  $a_1$  (excluding  $a_0$ ).  
 1102 Hence,  $|\Pi(a_1)| \geq L + 1$  as otherwise more than  $R - L > t$  agents from  $X$  are not assigned to  $a_1$  and  
 1103 will be unsatisfied. By applying the above reasoning for the next  $i \geq 2$ , we infer that  $|\Pi(a_i)| \geq L + 1$   
 1104 holds for all  $i \in [\hat{n}]$ . Similarly, we infer that  $|\Pi(b_\ell)| \geq L + 1$  holds for every  $\ell \in [\hat{m}]$ .

1105 *Statement (4):* Suppose this is not true, i.e.,  $|\Pi(c_0)| \geq 2R + 1$ . Then, by Statements (1)–(2) and by  
 1106 the bound  $t = 2h + \binom{h}{2}$ , at most  $h$  agents from  $V \setminus (W \cup E)$  can be unsatisfied. By construction,  
 1107 every agent in  $X$  that is assigned to  $c_0$  will be unsatisfied since he prefers  $(a_1, L + 1)$  to  $(c_0, 2R + 1)$ .  
 1108 Hence, at most  $h$  agents from  $X$  can be assigned to  $c_0$ . This means that at least  $2R + 1 - h$  agents  
 1109 from  $W \cup P \cup \bigcup_{i \in [\hat{n}]} P_i \cup E \cup \bigcup_{\ell \in [\hat{m}]} F_\ell \cup Y$  need to be assigned to  $c_0$ . This is not possible however  
 1110 since  $R > (L + 2) \cdot (\hat{n} + \hat{m}) + h$  and  $|Y| = R$ .

1111 *Statement (5):* Let  $i \in [\hat{n}]$ . The statement follows directly from the fact that every agent  
 1112 prefers  $(c_0, 2R)$  to  $(a_i, L + 3)$  and  $|\Pi(c_0)| \leq 2R$  (see Claim C.5.1(1)):  $|\Pi(a_i)| > L + 2$   
 1113 would hold, then all agents assigned to  $a_i$  are unsatisfied, the number of which exceed  $t$  since  
 1114  $L > 2t$ . (end of the proof of Claim C.5.1  $\diamond$ )

1115 The next statement is about the structure of the agents assigned to  $A \cup B$ .

1116 **Claim C.5.2.** Let  $A' = \{a_i \in A : |\Pi(a_i)| = L + 2\}$  and  $B' = \{b_\ell \in B : |\Pi(b_\ell)| = L + 2\}$ . Then,  
 1117  $\Pi$  satisfies the following.

- 1118 (1)  $|A'| + |B'| \geq h + \binom{h}{2}$ .
- 1119 (2) For each post  $a_i \in A'$ , at least two agents in  $\Pi(a_i)$  are unsatisfied; for each post  $b_\ell \in B'$ , at  
 1120 least one agent in  $\Pi(b_\ell)$  is unsatisfied.
- 1121 (3)  $|A'| \leq h$  and  $|B'| \geq \binom{h}{2}$ .
- 1122 (4) For each post  $b_\ell \in B'$  it holds that  $|\Pi(a_i)| = |\Pi(a_j)| = L + 2$  where  $e_\ell = \{u_i, u_j\}$ .

1123 *Proof. Statement (1):* This can be shown by simple calculation. By Claim C.5.1(1) and (4), at least  
 1124  $(L + 2) \cdot (\hat{n} + \hat{m}) - (\hat{n} - h) - (\hat{m} - \binom{h}{2}) = (L + 1) \cdot (\hat{n} + \hat{m}) + h + \binom{h}{2}$  agents are assigned to the  
 1125 posts of  $A \cup B$ . By Claim C.5.1(3) and (5), each post in  $A \cup B$  is assigned either  $L + 1$  or  $L + 2$   
 1126 agents. That is, at least  $h + \binom{h}{2}$  of the post in  $A \cup B$  are each assigned  $L + 2$  agents, confirming that  
 1127  $|A'| + |B'| \geq h + \binom{h}{2}$ .

1128 *Statement (2):* For each post  $a_i \in A'$ , since  $|\Pi(a_i)| = L + 2$  and  $|P_i| = L$ , at least two agents in  
 1129  $\Pi(a_i)$  are not from  $P_i$ , i.e.,  $|\Pi(a_i) \setminus P_i| \geq 2$ . We claim that the agents in  $\Pi(a_i) \setminus P_i$  are unsatisfied  
 1130 by considering the preferences of all agents except  $P_i$ : Every agent from  $W \cup P$  prefers  $(a_0, \hat{n} -$   
 1131  $h)$  to  $(a_i, L + 2)$ . Every agent from  $E$  prefers  $(b_0, \hat{m} - \binom{h}{2})$  to  $(a_i, L + 2)$ . Every agent from  
 1132  $(\bigcup_{i' \in [\hat{n}] \setminus \{i\}} P_i) \cup (\bigcup_{\ell \in [\hat{m}]} F_\ell) \cup X \cup Y$  prefers  $(c_0, 2R)$  to  $(a_i, L + 2)$ . Since  $|\Pi(a_0)| = \hat{n} - h$ ,  
 1133  $|\Pi(b_0)| = \hat{m} - \binom{h}{2}$ , and  $|\Pi(c_0)| \leq 2R$  (see Claim C.5.1s(1) and (4)), we infer that every agent in  
 1134  $\Pi(a_i) \setminus P_i$  is unsatisfied.

1135 Similarly, for each post  $b_\ell \in B'$ , since  $|\Pi(b_\ell)| = L + 2$  and  $|F_\ell| = L + 1$ , at least one agent in  $\Pi(b_\ell)$   
 1136 is not from  $F_\ell$ . We claim that the agents in  $\Pi(b_\ell) \setminus F_\ell$  are unsatisfied by considering the preferences  
 1137 of all agents except  $P_i$ : Every agent from  $W \cup P \cup (\bigcup_{i \in [\hat{n}]} P_i) \cup (\bigcup_{\ell' \in [\hat{m}] \setminus \{\ell\}} F_{\ell'}) \cup X \cup Y$  prefers  
 1138  $(c_0, 2R)$  to  $(b_\ell, L + 2)$ . Every agent from  $E$  prefers  $(b_0, \hat{m} - \binom{h}{2})$  to  $(b_\ell, L + 2)$ . Again, since  
 1139  $|\Pi(b_0)| = \hat{m} - \binom{h}{2}$  and  $|\Pi(c_0)| \leq 2R$  (see Claim C.5.1(1) and (4)), we infer that every agent in  
 1140  $\Pi(b_\ell) \setminus F_\ell$  is unsatisfied.

1141 *Statement (3):* Statement (2) implies that at least  $2|A'| + |B'|$  agents are unsatisfied. By the upper  
 1142 bound that  $t \leq 2h + \binom{h}{2}$  and by Statement (1), we infer that  $|A'| \leq h$ , and hence  $|B'| \geq \binom{h}{2}$ .

1143 *Statement (4):* Suppose, towards a contradiction, that  $|\Pi(a_i)| \neq L + 2$ . Then, by Claim C.5.1(3) and  
 1144 (5), it follows that  $|\Pi(a_i)| = L + 1$ . We claim that every agent assigned to  $b_\ell$  is unsatisfied. Let us  
 1145 consider an arbitrary agent  $q \in \Pi(b_\ell)$ . Clearly, if  $q \in W \cup P \cup \bigcup_{\ell \in [\hat{m}]} P_\ell \cup X \cup Y \cup E \cup F \setminus (\{e_\ell\} \cup F_\ell)$ ,  
 1146 then he is unsatisfied since he prefers  $(c_0, 2R)$  to  $(b_\ell, L + 2)$ . If  $q = e_\ell$ , then he is unsatisfied since he  
 1147 prefers  $(b_0, \hat{m} - \binom{h}{2})$  to  $(b_\ell, L + 2)$ , while if  $q \in F_\ell$ , then he is unsatisfied since he prefers  $(a_i, L + 1)$   
 1148 to  $(b_\ell, L + 2)$  as well. This concludes the proof that every agent in  $\Pi(b_\ell)$  is unsatisfied, implying that  
 1149 more than  $L > 2t$  agents is unsatisfied, a contradiction.

1150 By an analogous reasoning, we can show that  $|\Pi(a_j)| = L + 2$ . (end of the proof of Claim C.5.2  $\diamond$ )

1151 Now, we are ready to show the existence of a size- $h$  clique. By Claim C.5.2(3),  $B'$  corresponds  
 1152 to at least  $\binom{h}{2}$  edges. Hence, there are at least  $h$  vertices incident to any edge corresponding to  $B'$ .  
 1153 For each vertex  $a_i$  that is “incident” to any edge-post in  $B'$ , we know by Claim C.5.2(4) that its  
 1154 corresponding vertex-post  $a_i$  must be assigned  $L + 2$  posts. By Claim C.5.2(3), there are at most  $h$   
 1155 such vertex-posts. Hence, there are exactly  $h$  vertex-posts that are each assigned  $L + 2$  agents, and  
 1156 this is possible if and only if they form a size- $h$  clique.  $\square$
