# Supplementary material
Source: ML conference proceedings conference paper supplement (https://openreview.net/forum?id=DZnBoIAy4V)
Supplement: supplementary_material [file neurips_2025-congested-supp.pdf › neurips_2025-congested-supp.pdf]

# Supplementary Material for the Paper “Assignments for Congestion-Averse Agents: Seeking Competitive and Envy-Free Solutions”

## A Additional Material for Section 2

### A.1 Proof of Lemma 1

**Lemma 1** ( $\star$ ). (1) *CP implies EF, but the converse does not hold.*

(2) *CP implies NS, but the converse does not hold.*

(3) *NS implies TG and NW, but the converse does not hold.*

(4) *EF is incomparable to NS, to TG, and to NW, respectively; TG is incomparable to NW.*

*Proof.* (1) Clearly, CP implies EF by definition. Now, to show that the converse does not hold, let us consider Example 1. Clearly assigning every agent to post  $a_1$  is EF, but it is not CP since it is not TG.

(2) As already mentioned, the implication has been discussed by Bogomolnaia and Moulin [6] already. For the sake of completeness, we provide a proof by showing the contra-positive. Assume that assignment  $\Pi$  is not NS and let there be an agent  $v \in V$  and a post  $a \in A$  such that  $v$  prefers  $(a, |\Pi(a)| + 1)$  to  $(a^*, |\Pi(a^*)|)$  where  $a^*$  denotes the post that  $v$  is assigned to. If  $a$  is empty, then clearly,  $\Pi$  is wasteful and hence not CP. If  $a$  is non-empty, then since every agent is averse against congestions, we infer that  $v$  prefers  $(a, |\Pi(a)|)$  to  $(a^*, |\Pi(a^*)|)$ , and hence not CP either.

Now, to show that the converse does not hold, let us consider Example 1 again.  $\Pi_1$  is NS, but not CP.

(3) That NS implies NW follows directly from definition. That “NS implies TG” has also been shown by Bogomolnaia and Moulin [6]. We show the contra-positive for the sake of completeness. Let  $\Pi$  be an assignment that is not TG, and let  $v \in V$  be an agent that is assigned to post  $a^*$  such that  $(a^*, |\Pi(a^*)|)$  is *not* among his top- $|V|$  choices. Let  $X = \{(a, d) \mid (a, d) \succ_v (a^*, |\Pi(a^*)|)\}$ . Then,  $|X| \geq |V|$ . For each  $a \in A$ , let  $\delta(a)$  denote the largest congestion such that  $(a, \delta(a)) \in X$ , i.e.,  $\delta(a) = \max_{(a, d) \in X} \{d\}$ . Then,  $\sum_{a \in A} \delta(a) = |X| \geq |V| = \sum_{a \in A} |\Pi(a)|$ . By assumption, we have that  $\delta(a^*) < |\Pi(a^*)|$ . This implies that there must exist a post  $a \in A \setminus \{a^*\}$  such that  $\delta(a) > |\Pi(a)|$ . By definition, we infer that  $(a, |\Pi(a)| + 1) \in X$ , and hence  $(a, |\Pi(a)| + 1) \succ_v (a^*, |\Pi(a^*)|)$ , witnessing that  $\Pi$  is not NS.

It is quite easy to come up with a TG and NW assignment which is not NS. For the sake of completeness, let us consider the following example.

$v_1: (a_1, 1) \succ (a_1, 2) \succ (a_2, 1) \succ \dots$ ,  
 $v_2: (a_1, 1) \succ (a_2, 1) \succ (a_1, 2) \succ \dots$ ,  
 $v_3: (a_3, 1) \succ (a_3, 2) \succ (a_3, 3) \succ \dots$

$$\Pi_3: \begin{array}{c|c|c} a_1 & a_2 & a_3 \\ \hline v_2 & v_1 & v_3 \end{array} \quad \Pi_4: \begin{array}{c|c|c} a_1 & a_2 & a_3 \\ \hline v_1, v_2 & & v_3 \end{array}$$

$\Pi_3$  is clearly TG and NW. It is not NS however, since  $v_1$  prefers  $(a_1, 2)$  to  $(a_2, 1)$ .

(4) Let us consider Example 1. Assigning every agent to the same post is clearly EF, but not TG and not NW. Hence, it is not NS. As already argued in Example 1,  $\Pi_1$  is NS, TG, and NW, but not EF. Assigning  $v_1$  and  $v_2$  to  $a_2$ , and  $v_3$  to  $a_1$  is NW, but not TG: For  $v_1$ , tuple  $(a_2, 2)$  is *not* his top 3 choices.

Now, let us consider the example from previous item.  $\Pi_4$  is TG but not NW. □

By definition, we observe the following:

**Observation 2.** For an arbitrary tie-breaking rule,  $\sum_{a \in A} \lambda(v, a) = |V|$  holds for every  $v \in V$ .

### A.2 Proof of Lemma 2

**Lemma 2** ( $\star$ ). Given a congestion vector  $\vec{s}$  with  $\sum_{a \in A} \vec{s}[a] = |V|$ , in polynomial-time one can determine the smallest number  $t$  of unsatisfied agents among all assignments whose congestion vectors equal  $\vec{s}$ ; the corresponding assignment can found in polynomial time.

*Proof.* The idea is to iterate over all possible number  $t \in \{0, 1, \dots, |V|\}$  and check whether there exists an assignment with congestion vector  $\vec{s}$  and exactly  $t$  unsatisfied agents. The later problem

516 can be solved via determining whether a perfect  $\vec{b}$ -matching exists, which can be done in polynomial  
 517 time [29, Chapter 12].

518 Let  $(A, V, (\succ)_{v \in V})$  be an instance of CONGESTED ASSIGNMENT. To check whether there exists an  
 519 assignment with congestion vector  $\vec{s}$  and exactly  $t$  unsatisfied agents, we construct a bipartite graph  $G$   
 520 on two disjoint sets  $X$  and  $Y$  with  $X = A \cup \{a_0\}$  and  $Y = V \cup \{w_1, \dots, w_t\}$ , where the  $w_z$ 's are the  
 521 dummy agent-vertices and  $a_0$  is a dummy post-vertex.

522 We add an edge between every original post  $a_j$  and every dummy agent-vertex  $w_z$ , and an edge  
 523 between the dummy post-vertex  $a_0$  and every original agent  $v_i$ . We also add an edge between every  
 524 original post and original agent, but will delete some according to the congestions as follows:

525 For each original agent  $v$  and each two original posts  $a$  and  $a'$ , if  $v$  strictly prefers  $(a, \vec{s}[a])$  to  
 526  $(a', \vec{s}[a'])$ , then we delete the edge  $\{a', v\}$ . This is because if  $v$  would be satisfied, he will never be  
 527 assigned to  $a'$  since he will envy some agent that is assigned to  $a$ .

528 This completes the construction of the graph  $G$ . We check whether there exists a *perfect*  $\vec{b}$ -matching<sup>3</sup>  
 529 for  $G$  where  $\vec{b}[a_0] = t$ ,  $\vec{b}[a_j] = \vec{s}[a_j]$  for all  $a_j \in A$ , and  $\vec{b}[x] = 1$  for all  $x \in X$ , and answer yes if  
 530 such matching exists, and no otherwise.

531 For the correctness, it is straightforward that if  $\Pi$  is an assignment with congestion vector  $\vec{s}$  and  
 532 exactly  $t$  unsatisfied agents  $V'$ , then the following matching is a perfect  $\vec{b}$  matching:  $M[v_i] = a_j$   
 533 if  $v_i \in V \setminus V'$ , and  $M[v_i] = a_0$  otherwise. Finally, for each original post  $a_j$ , if it is assigned  $\hat{n}$   
 534 unsatisfied agents, then we pick  $\hat{n}$  distinct dummy agent-vertices and match them to  $a_j$ .

535 If  $M$  is a perfect  $\vec{b}$ -matching for  $G$ , then  $a_0$  is matched with exactly  $t$  original agents who will be the  
 536 unsatisfied agents by assigning them to the post to replace the dummy agents one-by-one.

537 Since checking the existence of a perfect  $\vec{b}$ -matching can be done in polynomial time by reducing  
 538 to finding a perfect matching, the whole approach can be done in polynomial time as well. This  
 539 completes the proof.

540 For an illustration, consider the first instance in Example 1. Let the congestion vector be  $\vec{s} = (2, 1)$   
 541 and the number of unsatisfied agents be  $t = 0$ . The following bipartite graph  $G$  has a perfect  $\vec{b}$ -  
 542 matching, indicated by the red lines.

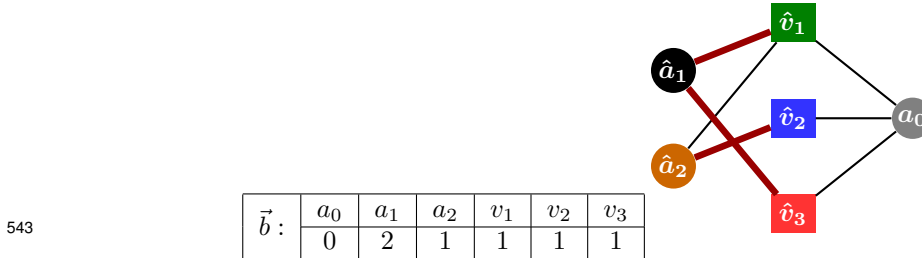

544 Indeed, the corresponding  $\vec{b}$ -matching yields a CP assignment which is  $\Pi_2$  and it has only satisfied  
 545 agents.  $\square$

## 546 B Additional Material for Section 3

## 547 C Additional Material for Section 3.1

### 548 C.1 Example of Construction 1

549 Let us consider the four agents with the following preference lists.

550

$$\begin{aligned}
 v_1: & (a_1, 1) \succ (a_2, 1) \succ (a_3, 1) \sim (a_1, 2) \sim (a_2, 2) \succ \dots, \\
 v_2, v_3: & (a_2, 1) \succ (a_1, 1) \succ (a_3, 1) \sim (a_1, 2) \sim (a_2, 2) \succ \dots, \\
 v_4: & (a_1, 1) \sim (a_2, 1) \succ (a_1, 2) \sim (a_2, 2) \succ (a_3, 1) \succ \dots,
 \end{aligned}$$

<sup>3</sup>A  $\vec{b}$ -matching  $M$  is *perfect* if  $\sum_{e \in M: u \in e} 1 = \vec{b}[u]$  holds for all vertices  $u$ .

One can observe that if every post is filled, then  $a_1$  or  $a_2$  will have congestion one. If  $a_1$  has congestion one, then  $v_1$  has to be assigned to  $a_1$  alone and  $v_4$  to  $a_2$  alone, leaving  $v_2$  and  $v_3$  to be envious. If  $a_2$  has congestion one, then  $v_2$  or  $v_3$  will be envious. One can verify that assigning any two agents to  $a_1$  and the remaining two to  $a_2$  is competitive, leaving  $a_3$  empty.

Now, let us “guess” that the number of empty post is  $k = 1$ . For  $k = 1$ , we augment the instance with one dummy agent  $u_1$  and two auxiliary agents  $p_1$  and  $p_2$ , and two dummy posts  $b_1$  and  $b_2$ . Their preference lists are as follows:

$$\begin{aligned} u_1: & (a_1, 1) \sim (a_2, 1) \sim (a_3, 1) \succ (b_1, 1) \succ (b_1, 2) \succ (b_1, 3); \\ p_1: & (b_1, 1) \succ (b_2, 1) \succ (b_2, 2) \succ \dots \succ (b_2, 5); \\ p_2: & (b_2, 1) \succ (b_1, 1) \succ (b_1, 2) \succ \dots \succ (b_1, 5). \end{aligned}$$

One can verify that in the original instance, every CP assignment will leave  $a_3$  empty, and in the augmented instance, every CP assignment will assign the dummy agent  $u_1$  to  $a_3$  alone. The correctness is given by Lemma 3.

## C.2 Proof of Observation 1

**Observation 1** ( $\star$ ). Let  $I_k = (A^*, V^*, (\succeq_v^*)_{v \in V^*})$  denote the instance created by Construction 1 with  $A^* = A \cup \{b_1, b_2\}$  and  $V^* = V \cup \{u_i \mid i \in [k]\} \cup \{p_1, p_2\}$ . Every CP assignment of  $I_k$  (if it exists) satisfies the following: (1)  $p_1$  is assigned to  $b_1$  alone, and  $p_2$  to  $b_2$  alone. (2) Every dummy  $u_z$  with  $1 \leq z \leq k$  is assigned to some  $a_j \in A$  alone. (3) Every original  $v_i \in V$  is assigned to some original post.

*Proof.* Let  $\Pi$  be a CP assignment of  $I_k$  with  $\Pi = (S_a)_{a \in A^*}$ . To show the first part of statement (1), we observe that if  $p_1$  is assigned to  $b_1$ , then  $|S_{b_1}| = 1$ , due to the maximum congestion of  $p_1$  towards  $b_1$ . Thus, it suffices to show that  $p_1$  is indeed assigned to  $b_1$ . Suppose, for the sake of contradiction, that  $p_1$  was assigned to  $b_2$  instead; note that he will not be assigned to any original post  $a_j$  due to his maximum congestion towards  $a_j$ . Then, by the maximum congestion of  $p_2$  towards  $b_2$ , agent  $p_2$  could not be assigned to  $b_2$ . No original agent could be assigned to  $b_2$  either, due to his maximum congestion towards  $b_2$ . Hence, we would have  $S_{b_2} = \{p_1\}$  and  $p_2$  would envy  $p_1$ , a contradiction to the competitiveness.

The second part of statement (1) follows directly from the first part since  $b_2$  is the only acceptable post left for  $p_2$  and his maximum congestion towards  $b_2$  is one.

By statement (1) and the maximum congestions, every dummy agent  $u_z$  can only be assigned to some original post alone, proving statement (2). The last statement follows directly from the first two statements.  $\square$

## C.3 Continuation of the proof of Lemma 3

**Lemma 3** ( $\star$ ). An instance  $I$  admits a CP assignment if and only if there exists an integer  $k$  with  $\max(0, m - n) \leq k \leq m - 1$  such that the instance  $I_k$  created by Construction 1 admits a CP assignment with only filled post.

We continue to show why  $\Pi_k$  is CP. Since no post is empty, showing competitiveness reduces to showing that no agent is envious. This is clearly the case for all dummy agents including  $p_1$  and  $p_2$  since they are assigned to one of their most preferred posts alone. No original agent envies any other original agent or dummy agent since  $\Pi$  is CP. No original agent  $v \in V$  envies  $p_1$  or  $p_2$  since  $p_1$  and  $p_2$  are assigned to  $b_1$  and  $b_2$ , and  $b_1$  and  $b_2$  occurs at the end of  $\succeq_v^*$ . This shows that  $\Pi_k$  is CP for  $I_k$ , as desired.

For the “if” part, let  $k$  be an integer between  $\max(0, m - n)$  and  $m - 1$  such that the created instance  $I_k$  admits a CP assignment  $\Pi_k$  without empty post. We claim that the assignment  $\Pi$  derived from  $\Pi_k$  by omitting all dummy agents and the posts  $p_1$  and  $p_2$  is CP for  $I$ .

We first show that  $\Pi$  is a valid assignment for  $I$ . By Observation 1(2), every dummy agent is assigned to some original post alone, and hence for each  $a_j \in A$  that is not assigned any dummy post (i.e.,  $\{u_1, \dots, u_k\} \cap \Pi_k(a_j) = \emptyset$ ), we have  $\Pi(a_j) = \Pi_k(a_j)$ ; and  $\Pi(a_j) = \emptyset$ , otherwise. This implies that  $\Pi(a_j) \subseteq V$ .

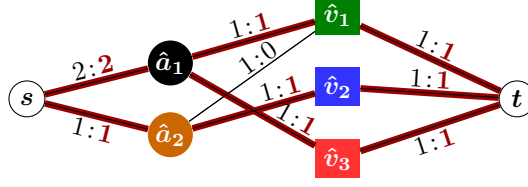

Figure 2: Flow network for iteration 2 where  $T = 21$ .

By Observation 1(3), every original agent is assigned to an original post, confirming that  $\Pi$  is indeed a valid assignment for  $I$ .

Next, suppose, for the sake of contradiction, that  $\Pi$  is not competitive and let  $v$  and  $a$  be an agent and a post, respectively, such that  $(a, \max(|\Pi(a)|, 1)) \succ_v (a', |\Pi(a')|)$  where  $a'$  is the post that  $v$  is assigned to by  $\Pi$ . We infer that  $\Pi(a)$  cannot be empty since otherwise by Construction 1 and by Observation 1(2) we would have that  $\Pi_k(a) = \{u_z\}$  for some dummy agent  $u_z$ . This further implies that  $v$  envies  $u_z$  in  $I_k$ , a contradiction to the competitiveness of  $\Pi_k$ . Since  $\Pi(a)$  is not empty and  $v \in \Pi(a')$ , again by Construction 1 and by Observation 1(2), we have that  $\Pi(a) = \Pi_k(a)$  and  $\Pi(a') = \Pi_k(a')$ . Since  $\succeq_v^*$  is an extension of  $\succeq_v$  for each  $v \in A$ , we obtain that  $(a, |\Pi_k(a)|) \succ_v^* (a', |\Pi_k(a')|)$  a contradiction to the competitiveness of  $\Pi_k$ .

#### C.4 Example of Algorithm 1

Consider the first instance in Example 1. Initially,  $T[a_1] = T[a_2] = 1$ , implying that the condition in Line 4 is satisfied, so we can start with the first iteration. In the first iteration, where  $T = 11$ , the network and its maximum flow constructed in Phase 1 (Lines 5–6) have been discussed in Example 2 already. Hence, we proceed with Line 7. Since it does not have value  $|V| = 3$ , we proceed with Phase 2, where we find an obstruction in Lines 8–14. We start with  $V' = \{\hat{v}_3\}$  and  $A' = \emptyset$  since  $\hat{v}_3$  is the only vertex with  $f(\hat{v}_3, t) = 0$ . In the while-loop in Lines 10–14, we first find  $\hat{a}_1$  and enlarge  $A' = \{\hat{a}_1\}$ . Then, we enlarge  $V' = \{\hat{v}_3, \hat{v}_1\}$  in Line 13. Since no further post  $\hat{a}$  exists that has an arc to any agent  $\hat{v}$  in  $V'$ . We stop with  $A' = \{\hat{a}_1\}$  and  $V' = \{\hat{v}_3, \hat{v}_1\}$ . One can check that if  $a_1$  would stay with congestion one, then no CP assignment can exist since both  $v_1$  and  $v_3$  would envy the only agent that is assigned to  $a_1$ . We will later show that in order to have a CP assignment, it is necessary to increase the congestion of every post in  $A'$ . In Phase 3, we increment  $T[a_1]$  to 2. This completes the first iteration.

At Line 4, we verify that  $T[a_1] + T[a_2] = 3 \leq |V|$ , we continue with the second iteration. In the following, the tuples considered in Construction 2(v) are boldfaced.

$$\begin{aligned} v_1: & (a_1, 1) \succ (\mathbf{a_1, 2}) \sim (\mathbf{a_2, 1}) \succ (a_2, 2) \succ \dots, \\ v_2: & (a_1, 1) \sim (\mathbf{a_2, 1}) \succ (a_1, 2) \succ (a_2, 2) \succ \dots, \\ v_3: & (a_1, 1) \succ (\mathbf{a_1, 2}) \succ (a_2, 1) \succ (a_2, 2) \succ \dots. \end{aligned}$$

One can verify that among all tuples  $(a, T[a])$ ,  $a \in A$ , tuple  $(a_1, 2)$  is the most preferred tuple of  $v_1$  and  $v_3$ , while  $(a_2, 1)$  is the most preferred tuple of  $v_1$  and  $v_2$ . Hence, the network and maximum flow (highlighted with red lines) constructed in Phase 1 are as given in Figure 2; we note that this corresponds to the bipartite graph in Appendix A.2.

In Line 6, we verify that the maximum flow is a perfect flow (i.e., with value  $|V|$ ). Hence, we derive and return an assignment according to Definition 2. This is exactly  $\Pi_2$  from Example 1.

One can verify that the second instance of Example 1 where every agent has the same preference list as  $v_2$  will lead to the sum of the congestion entries to exceed  $|V| = 3$  in the second iteration, certifying that the instance does not have a CP assignment.

#### C.5 Proof of Lemma 4

**Lemma 4** ( $\star$ ). *Each  $(A', V')$  computed in Phase 2 in lines 8–14 is an obstruction.*

635 *Proof.* Let  $(A', V')$  be the pair computed in lines 8–14 in some iteration  $z$ . Let  $(G, c)$  be the network  
 636 with  $G = (\hat{A} \cup \hat{V} \cup \{s, t\}, E)$  and  $f$  the maximum flow computed in this iteration. We aim to show  
 637 that  $(A', V')$  satisfies the properties in Definition 3.

638 By line 7,  $f$  fails to have value  $|V|$ , i.e.,  $\sum_{\hat{v} \in \hat{V}} f(\hat{v}, t) < |V|$ . Hence, there must be a vertex  $\hat{v}^* \in \hat{V}$   
 639 with  $f(\hat{v}^*, t) = 0$ . Let  $\hat{v}^*$  be such a vertex that is added to  $V'$  in line 9. Then, the first part of  
 640 property (i) is clear since  $\hat{v}^* \in V'$  (line 9) and we only add vertices from  $\hat{V}$  to  $V'$ ; see line 13.

641 Property (ii) is also clear due to line 11.

642 Let us consider property (iii). Clearly, for every vertex  $\hat{a} \in A'$  with  $(\hat{a}, \hat{v}^*) \in E(G)$  we must have  
 643 that  $f(s, \hat{a}) = c(s, \hat{a})$  as otherwise we could increase the flow by one by setting  $f(s, \hat{a}) = f(s, \hat{a}) + 1$   
 644 and  $f(\hat{a}, \hat{v}^*) = f(\hat{v}^*, t) = 1$ . By line 13, every out-neighbor  $\hat{v}$  of  $\hat{a}$  with  $f(\hat{a}, \hat{v}) = 1$  is added to  $V'$ .  
 645 Together with  $\hat{v}^*$ , we obtain that  $c(s, \hat{a}) < |\{\hat{v} \in V' \mid (\hat{a}, \hat{v}) \in E\}|$ , as desired.

646 Consider an arbitrary vertex  $\hat{a} \in A'$  with  $(\hat{a}, \hat{v}^*) \notin E(G)$ . Suppose, towards a contradiction, that  $\hat{a}$   
 647 does not satisfy property (iii), meaning that  $c(s, \hat{a}) \geq |\{\hat{v}' \in V' \mid (\hat{a}, \hat{v}') \in E(G)\}|$ . We aim to show  
 648 that there is an “augmenting” path from  $\hat{a}$  to  $\hat{v}^*$ , with arcs having flow values alternating between  
 649 zero and one, which is a witness for the flow to be not maximum.

650 Let us review the repeat-loop in lines 10–14. Observe that in each round of this loop, we aim at  
 651 finding a vertex  $\hat{a}$  not already in  $A'$  that has an out-arc to some agent-vertex from  $V'$ ;  $V'$  is initialized  
 652 with  $V' = \{\hat{v}^*\}$ . This implies that we can find a vertex in  $\hat{v}_x \in V' \setminus \{\hat{v}^*\}$  due to which we add  $\hat{a}$  in  
 653 line 11. Further, for each vertex  $\hat{v}'$  in  $V' \setminus \{\hat{v}^*\}$ , we can also find a vertex  $\hat{a}'$  in a previous round such  
 654 that  $f(\hat{a}', \hat{v}') = 1$  in line 13. Let  $\hat{a}_x$  be the vertex from  $A'$  due to which we add  $\hat{v}_x$ , i.e.,  $f(\hat{a}_x, \hat{v}_x) = 1$ .  
 655 Since each vertex in  $V'$  has only one out-arc with capacity one, due to the conservation constraint  
 656 of the flow  $f$ , we infer that  $f(\hat{a}, \hat{v}_x) = 0$ ; recall that  $f(\hat{a}_x, \hat{v}_x) = 1$ . Repeating the above reasoning,  
 657 there must be a vertex  $\hat{v}_{x-1}$  from  $V' \setminus \{\hat{v}_x\}$  due to which we add  $\hat{a}_x$ . Then, either  $\hat{v}_{x-1} = \hat{v}^*$  or  
 658  $\hat{v}_{x-1} \neq \hat{v}^*$ .

659 In the former case, we infer that  $(\hat{a}, \hat{v}_x, \hat{a}_x, \hat{v}^*)$  is an augmenting path, so flipping the flow values  
 660 along the path would increase the value of the flow:

$$\begin{aligned} f(s, \hat{a}) &= f(s, \hat{a}) + 1, & f(\hat{a}, \hat{v}_x) &= 1, \\ f(\hat{a}_x, \hat{v}_x) &= 0, & f(\hat{a}_x, \hat{v}^*) &= f(\hat{v}^*, t) = 1, \end{aligned}$$

661 a contradiction.

662 In the latter case, since  $V'$  is finite and no vertex from  $\hat{V}$  can obtain more than one positive flow, by  
 663 repeating the above reasoning, we must end up with an arc to  $\hat{v}^*$  with zero flow; recall that  $\hat{v}^* \in V'$ .  
 664 Then, we again obtain an augmenting path  $P = (\hat{a}, \hat{v}_x, \hat{a}_x, \dots, \hat{a}_0, \hat{v}_0 = \hat{v}^*)$ . Analogously, we can  
 665 increase the total flow by flipping the flow values along this path, a contradiction.

666 It remains to show property (iv). This is clear since otherwise for each vertex  $\hat{v} \in V'$  we could find a  
 667 vertex  $\hat{a} \in A'$  and set  $f(\hat{a}, \hat{v}) = f(\hat{v}, t) = 1$ . In particular, the starting vertex  $\hat{v}^*$  would have positive  
 668 flow going through it, a contradiction.  $\square$

## 669 C.6 Proof of Lemma 5

670 **Lemma 5** ( $\star$ ). Assume that  $I$  admits a CP assignment  $\Pi$  with no posts being empty. Then, for each  
 671 iteration  $z \geq 1$  and each obstruction  $(A', V')$  found in iteration  $z$ , for each  $a \in A$ , if  $\hat{a} \in A'$ , then  
 672  $|\Pi(a)| \geq T_z[a] + 1$ ; otherwise  $|\Pi(a)| \geq T_z[a]$ .

673 *Proof.* Let us consider the first iteration and let  $(A', V')$  be the found obstruction. Since  $\Pi$  does not  
 674 have empty posts, the statement clearly holds for all posts  $a \in A$  with  $\hat{a} \notin A'$ . Let  $N = (G, c)$  denote  
 675 the network and  $f$  the maximum flow of  $N$  computed in the first phase. Let  $P = \{v \in V \mid \hat{v} \in V'\}$   
 676 and  $Q = \{a \in A \mid \hat{a} \in A'\}$  be the set of agents and posts that correspond to the vertices in  $V'$  and  
 677  $A'$ , respectively.

678 Suppose, for the sake of contradiction, that there exists a post  $a \in Q$  with  $|\Pi(a)| \leq T_1[a] = 1$ .  
 679 By Definition 3(iii), more than  $c(s, \hat{a}) = T_1[a] = 1$  vertex from  $V'$  is incident to  $\hat{a}$  in  $G$ . By  
 680 Construction 2(v), at least two agents from  $P$  consider  $(a, 1)$  as one of the most preferred tuples.

Since  $|\Pi(a)| \leq 1$ , at least one agent from  $P$  is not assigned to  $a$  but considers  $(a, 1)$  as one of the most preferred tuples. Let  $v_0 \in P$  be such an agent. Then, he must be assigned to some other post  $a_0$  such that  $(a_0, |\Pi(a_0)|)$  is one of the most preferred tuples for  $v_0$  as well. This implies that  $|\Pi(a_0)| = 1$  since we are in the first iteration. By Construction 2(v), we infer that  $(\hat{a}_0, \hat{v}_0) \in E(G)$ , and by line 11, that  $\hat{a}_0 \in A'$ .

By Definition 3(iii), more than  $c(s, \hat{a}_0) = T_1[a_0] = 1$  vertex from  $V'$  is incident to  $\hat{a}_0$  in  $G$ , and we can find another agent  $v_1 \in P$  that is not assigned to  $a_0$  but considers  $(a_0, 1)$  as one of the most preferred tuples. Again, this agent  $v_1$  will be assigned to some post  $a_1$  with  $(a_1, 1)$  being one of the most preferred tuples of  $v_1$ . By Construction 2(v), we infer that  $(\hat{a}_1, \hat{v}_1) \in E(G)$ , and by line 11 that  $\hat{a}_1 \in A'$ . Repeating the above reasoning, we will be able to find a distinct vertex  $\hat{a}_i \in A'$  for each vertex  $\hat{v}_i \in V'$  such that  $\Pi(a_i) = \{\hat{v}_i\}$ . That is,  $|A'| \geq |V'|$ , a contradiction to Definition 3(iv) since  $|A'| = \sum_{\hat{a} \in A'} c(s, \hat{a}) < |V'|$  in this case.

Now, let us consider other iterations. For each  $z$ , let  $(A'_z, V'_z)$  be the obstruction found in iteration  $z$ . Note that the table entries never decrease. Hence, if the statement were incorrect, there must be an iteration  $z \geq 2$  where the statement holds in all iterations  $z' \leq z - 1$  but not in iteration  $z$ .

Suppose, for the sake of contradiction, that the statement is incorrect and let  $z$  be the index of the first such iteration where the statement is incorrect. That is, in all iterations  $z' \leq z - 1$ , we have that for all  $a' \in A$ ,

$$\text{if } \hat{a}' \in A'_z, |\Pi(a')| \geq T_{z'}[a'] + 1; \text{ otherwise } |\Pi(a')| \geq T_{z'}[a'] \quad (1)$$

but there exists a post  $a$  such that

$$\text{if } \hat{a} \in A'_z, |\Pi(a)| \leq T_z[a]; \text{ if } \hat{a} \notin A'_z, |\Pi(a)| < T_z[a]. \quad (2)$$

First, observe that  $\hat{a} \in A'_z$  since otherwise  $|\Pi(a)| \geq T_{z-1}[a] = T_z[a]$  by line 15, a contradiction to the assumption.

Next, we claim that  $T_z[a] = |\Pi(a)|$ . If  $\hat{a} \in A'_{z-1}$  (i.e.,  $\hat{a}$  was in the obstruction found in iteration  $z - 1$ ), then by assumption (1)–(2) and by line 15, we infer  $|\Pi(a)| \geq T_{z-1}[a] + 1 = T_z[a] \geq |\Pi(a)|$ , as desired. If  $\hat{a} \notin A'_{z-1}$ , then again by assumption (1)–(2) and by line 15, we infer  $|\Pi(a)| \geq T_{z-1}[a] = T_z[a] \geq |\Pi(a)|$ , as desired as well.

Recall that we inferred that  $\hat{a} \in A'_z$ . Let  $(G, c)$  denote the network constructed in iteration  $z$ . By Lemma 4,  $(A'_z, V'_z)$  is an obstruction for  $(G, c)$ . Let  $\hat{v}^* \in V'$  be the starting vertex with  $f(\hat{v}^*, t) = 0$ . By Definition 3(iii), more than  $c(s, \hat{a}) = T_z[a]$  vertices from  $V'_z$  exist that have  $a$  as an in-neighbor. By Construction 2(v), more than  $T_z[a] = |\Pi(a)|$  agents from  $V'_z$  consider  $(a, T_z[a])$  as one of the most-preferred tuples among all  $(a', T_z[a'])$ . Hence, at least one of such agents is not assigned to  $a$  by  $\Pi$ .

Let  $\hat{v} \in V'_z$  be a vertex whose corresponding agent  $v$  considers  $(a, |\Pi(a)|)$  as one of the most preferred tuples but is assigned to some other post  $a' \neq a$ . Then,  $(\hat{a}, \hat{v}) \in E(G)$ . To prevent  $v$  from being envious (recall that no post is empty), we must have that  $(a', |\Pi(a')|) \succeq_v (a, |\Pi(a)|)$ .

We claim that  $\hat{a}' \in A'_z$  as well. Since  $(a, |\Pi(a)|)$  is one of the most-preferred tuples of  $v$  among all  $(a', T_z[a'])$ , by previous paragraph and by congestion aversion, we infer that  $T_z[a'] \geq |\Pi(a')|$ . If  $T_z[a'] > |\Pi(a')|$ , then by line 15, there must exist an iteration  $z' \in [z - 1]$  where  $\hat{a}' \in A'_{z'}$  and  $T_{z'}[a'] = |\Pi(a')|$ , a contradiction to (1). Hence,  $T_z[a'] = |\Pi(a')|$ , implying that  $(a', T_z[a'])$  is also one of the most preferred tuples of  $v$  among all  $(a'', T_z[a''])$ . By Construction 2(v), we have  $(\hat{a}', \hat{v}') \in E(G)$ , and by line 11, we have  $\hat{a}' \in A'_z$ , as desired.

By Definition 3(iii), we infer that more than  $c(a') = T_z[a'] = |\Pi(a')|$  vertices from  $V'_z$  have in-arcs from  $\hat{a}'$ . By Construction 2(v), more than  $c(a') = T_z[a'] = |\Pi(a')|$  agents consider  $(a', |\Pi(a')|)$  as one of the most preferred tuples among all  $(p, T[p]), p \in A$ .

Analogously, we can again find another vertex  $\hat{v}' \in V'_z$  such that  $v'$  considers  $(a', |\Pi(a')|)$  as one of the most preferred tuples among all  $(p, T[p]), p \in A$ , but is assigned to some other post  $a'' \neq a'$  with  $\hat{a}'' \in A'_z$  and  $T_z[a''] = |\Pi(a'')|$ . By repeating this argument, we infer that every vertex  $\hat{\alpha} \in A'_z$  has  $T_z[\alpha] = |\Pi(\alpha)|$ . By Definition 3(iv), we have that  $|V'_z| > \sum_{\hat{\alpha} \in A'_z} c(s, \hat{\alpha}) = \sum_{\hat{\alpha} \in A'_z} T_z[\alpha] = \sum_{\hat{\alpha} \in A'_z} |\Pi(\alpha)|$ . So there must be a vertex  $\hat{\mu} \in V'_z$  such that  $\mu$  is assigned to a post  $b$  with  $\hat{b} \notin A'_z$ . By line 11 and Construction 2(v), let  $\hat{\alpha} \in A'_z$  with  $(\hat{\alpha}, \hat{\mu}) \in E(G)$  such that  $(\alpha, T_z[\alpha])$  is a most preferred tuple of  $\mu$  among all tuples  $(p, T_z[p]), p \in A$ .



730 By our previous argument, we have that  $T_z[\alpha] = |\Pi(\alpha)|$ . By CP, we have that  $(b, |\Pi(b)|) \succeq_v$   
 731  $(\alpha, |\Pi(\alpha)|)$ . Since  $(\alpha, T_z[\alpha])$  is a most preferred tuple of  $\mu$  among all tuples  $(p, T_z[p])$ ,  $p \in A$ , we  
 732 further infer that  $T_z[b] \geq |\Pi(b)|$ .

733 Since  $b \notin A'_z$ , meaning by line 11 that  $(\hat{b}, \hat{\mu}) \notin E(G)$ , by Construction 2(v), we further infer that  
 734  $|\Pi(b)| < T_z[b]$ . By line 15, there must exist an iteration  $z' \in [z - 1]$  with  $T_{z'}[b] = |\Pi(b)|$  and  $T_{z'}[b]$   
 735 was incremented. This is a contradiction to (1) however.  $\square$

## 736 C.7 Proof of Lemma 6

737 **Lemma 6** ( $\star$ ). *If  $\Pi$  is an assignment returned in line 7, then  $\Pi$  is CP and has no empty post.*

738 *Proof.* Let  $z$  be the integration and  $f$  be the perfect flow based on which  $\Pi$  is computed in line 7. By  
 739 the definition of perfectness (see Definition 2), the value of  $f$  equals the number  $|V|$  of agents. This  
 740 means that  $\sum_{a \in A} |\Pi(a)| = |V|$ . By the capacity constraints, we obtain that  $|V| = \sum_{a \in A} |\Pi(a)| \leq$   
 741  $\sum_{a \in A} T_z[a] \leq |V|$ , the last inequality holds due to the while-loop-condition in line 4. Hence, for  
 742 each post  $a \in A$  we must have that  $|\Pi(a)| = T_z[a]$  since  $|\Pi(a)| \leq T_z[a]$  holds by the capacity  
 743 constraints in Construction 2(iii).

744 This implies that  $\Pi(a) \neq \emptyset$  since  $T_z[a] \geq 1$ . Hence, in order to show that  $\Pi$  is CP, it suffices to  
 745 show that for each agent  $v$  that is assigned to a post  $a$  and for each post  $a'$  with  $a' \neq a$  we have that  
 746  $(a, |\Pi(a)|) \succeq_v (a', |\Pi(a')|)$ . Suppose, for the sake of contradiction, that  $(a', |\Pi(a')|) \succ_v (a, |\Pi(a)|)$ ,  
 747 meaning by the first paragraph that  $(a', T_z[a']) \succ_v (a, T_z[a])$ , a contradiction to Construction 2(v).  
 748  $\square$

## 749 C.8 Continuation of the proof of Theorem 1

750 **Theorem 1** ( $\star$ ). *Algorithm 1 correctly decides whether an instance has a CP assignment in  $O(m^2 \cdot$   
 751  $(n + m)^2$ ) time, where  $m$  and  $n$  denote the number of posts and agents, respectively.*

752 It remains to analyze the running time. The main body of the algorithm is a for-loop (line 1) and  
 753 has at most  $m$  iterations. In each iteration  $k$ , the algorithm constructs a new instance  $I$  according  
 754 to Construction 1. Note that  $I$  has  $O(n + m)$  agents and  $O(m)$  posts, and it can be constructed in  
 755  $O((n + m)^2)$  time since each agent has  $O(n + m)$  tuples in his preference list. Then, we continue  
 756 with the big **while**-loop in lines 4–16. If we can show the **while**-loop run in  $O(m \cdot (n + m)^2)$  time,  
 757 we obtain our desired running time of  $O(m^2 \cdot (n + m)^2)$ .

758 So, it remains to analyze the **while**-loop. In line 3, initializing the table  $T$  needs  $O(m)$  time.  
 759 The while-loop (lines 4–15) runs at most  $n$  times since no table entries are ever decreased and in  
 760 each iteration at least one table entry is increased by one. For each iteration, we first construct a  
 761 network  $N = (G, c)$  based on  $(I, T)$ ; see Construction 2. The directed graph  $G$  has  $O(n + m)$   
 762 vertices and  $O(m \cdot n)$  arcs, and each capacity value is in  $O(n)$ . Hence, constructing the network  
 763 needs  $O(m \cdot n)$  time.

764 Afterwards, there are three phases. The first phase (lines 5–7) finds a maximum flow for  $N$  and  
 765 checks whether its value is  $|V|$ . Computing a maximum flow can be done in  $O(m \cdot n)$  time and  
 766 comparing two values needs constant time. Hence, the first phase needs  $O(m \cdot n)$  time.

767 The second phase (lines 8–14) finds an obstruction  $(A', V')$  by first finding a vertex  $\hat{v}^*$  with  $f(\hat{v}^*, t) =$   
 768  $0$ . This can be done in  $O(1)$  time if we store such information when we compare the value of the  
 769 flow with  $|V|$  in the first phase. Hence, the initialization of  $V'$  and  $A'$  needs  $O(1)$  time. Then, the  
 770 algorithm goes to the repeat-loop in lines 10–14. To analyze the running time of this loop, we observe  
 771 that there are  $O(m \cdot n)$  arcs between  $A'$  and  $V'$  and each arc only needs to be checked at most once  
 772 during the whole loop (line 11). Adding new vertices to  $V'$  can be done in  $O(m \cdot n)$  time as well  
 773 since for each newly added alternative  $\hat{a}$  there are at most  $n$  vertices  $\hat{v}$  from  $\hat{V}$  with positive flow  
 774 from  $\hat{a}$  to  $\hat{v}$ . Hence, the repeat-loop needs  $O(m \cdot n)$  time.

775 It is straightforward that the last phase (lines 15–15) runs in  $O(m)$  time. Summarizing, we obtain  
 776 that the desired  $O(m \cdot n^2)$  time for the **while**-loop.

## D Additional Material for Section 4

### D.1 Correctness of the Construction in the Proof of Theorem 2

**Theorem 2** (★). EF+TG is NP-complete; hardness holds even if there are no ties.

*Proof of the correctness of the construction.* One can verify that the constructed preferences do not contain ties. Due to TG, the maximum congestions of the agents are depicted in the following table, where  $v_i$  is an element-agent with  $u_i$  appearing in  $C_1, C_2, C_m$ :

|       | $a_1$ | $a_2$ | $a_3$ | $\dots$ | $a_m$ | $b_1$     | $b_2$         |
|-------|-------|-------|-------|---------|-------|-----------|---------------|
| $v_i$ | 3     | 3     | 0     | $\dots$ | 3     | 0         | $3n + 4m - 9$ |
| $p_z$ | 2     | 2     | 2     | $\dots$ | 2     | $3n + 2m$ | 0             |
| $q_z$ | 0     | 0     | 0     | $\dots$ | 0     | $3n + 2m$ | $2m$          |

**Correctness.** It remains to show the correctness, i.e.,  $I$  has an exact cover if and only if  $I'$  admits an EF and TG assignment.

For the “only if” part, let  $J \subseteq [m]$  denote an exact cover for  $I$ . Then, we claim that the following assignment  $\Pi$  is EF+TG:

- For each  $j \in J$ , let  $\Pi(a_j) = \{v_i \mid u_i \in C_j\}$ .
- For each  $j \in [m] \setminus J$ , let  $\Pi(a_j) = \emptyset$ .
- Let  $\Pi(b_1) = \{p_j \mid j \in [2m]\}$  and  $\Pi(b_2) = \{q_j \mid j \in [2m]\}$ .

Since each set-post contains either zero or three agents, no dummy agent envies any element-agent. The dummy agents also do not envy each other due to their preferences. Similarly, no two element-agents envy each other and no element-agent envies any dummy agent since he does not like  $b_1$  or  $b_2$  more.

For “if” part, let  $\Pi$  be an EF and TG assignment for the constructed instance. We aim at showing that the set-posts that are assigned element-agents constitute an exact cover. To this end, let  $J = \{j \mid \exists v_i \text{ with } v_i \in \Pi(a_j)\}$ . We first show two claims.

**Claim D.1.1.** For each set-post  $a_j$  it holds that  $|\Pi(a_j)| \in \{0, 3\}$ .

*Proof.* Since there are  $2m$  dummy agents  $\{p_1, p_2, \dots, p_{2m}\}$ , but there are only  $m$  set-posts, at least one dummy agent, say  $p_z$ , is not assigned to a set-post alone. Hence, for every set-post  $a_j$ , it holds that  $|\Pi(a_j)| \neq 1$  since otherwise  $p_z$  would envy the agent that is assigned to  $a_j$ . Since the maximum congestion for every set-post is 3, we further infer that  $|\Pi(a_j)| \in \{0, 2, 3\}$  holds for every set-post  $a_j$ . In particular, this implies that no dummy agent  $p_z$  with  $1 \leq z \leq 2m$  is assigned to a set-post alone.

Towards a contradiction, suppose that there exists a set-post  $a_j$  with  $|\Pi(a_j)| \notin \{0, 3\}$ . This implies that  $|\Pi(a_j)| = 2$ . Then, every dummy agent  $p_z$  with  $1 \leq z \leq 2m$  is to be assigned a set-post since otherwise he would envy the two agents that are assigned to  $a_j$ . Since there are exactly  $2m$  dummy agents  $p_1, \dots, p_{2m}$ , this means that every set-post  $a_x$ ,  $x \in [m]$ , must have  $|\Pi(a_x)| = 2$ . Then, no other agent can be assigned to the set-post. However, all element-agents will envy all  $p_i$ ’s, a contradiction. This concludes the proof.

(end of the proof of Claim D.1.1  $\diamond$ )

By Claim D.1.1, we know that each set-post is assigned either zero or three agents. Next, we show that every element-agent  $v_i$  is assigned to an *acceptable* set-post.

**Claim D.1.2.** For each element-agent  $v_i$  it holds that  $\Pi(v_i) \in \{a_j \mid j \in [m] \text{ and } u_i \in C_j\}$ .

*Proof.* Suppose this is not true, and by TG let  $v_i$  denote an element-agent that is assigned to  $b_2$ ; note that  $v_i$  does not find  $b_1$  acceptable. Since there are  $2m$  dummy agents  $q_z$  each with congestion  $2m$  for  $b_2$ , at least one of them is *not* assigned to  $b_2$ . This agent envies  $v_i$ , a contradiction.

(end of the proof of Claim D.1.2  $\diamond$ )

Claim D.1.2 implies that  $J$  is a set cover, while Claim D.1.1 implies that  $|J| \leq n$ . Altogether we conclude that  $J$  is an exact cover.  $\square$



## 820 D.2 Proof of Theorem 3

821 **Theorem 3** (★). EF+TG is FPT with respect to the number  $n$  of agents and the number  $m$  of posts,  
822 respectively.

823 *Proof.* We first consider the parameter  $n$ . Let  $I = (A, V, (\succeq_v)_{v \in V})$  be an instance of CONGESTED  
824 ASSIGNMENT. Due to TG, each agent is assigned to one of his first  $n$  tuples. Hence, for each  
825 agent  $v_i \in V$ , we guess (by brute-force searching) which of his first  $n$  tuples that  $v_i$  is “assigned”  
826 to, i.e.,  $(a, d)$ . After assigning all the agents, we check in linear time whether this results in a valid  
827 assignment, i.e., if we  $v_i$  “assign”  $(a, d)$ , then there must be exactly  $d$  agents that are guessed to be  
828 “assigned” to  $(a, d)$ . We abandon the current guess if it does not give a valid assignment; otherwise  
829 we proceed to check EF in  $O(n^2)$  time.

830 Since there are  $n$  agents, each with  $n$  choices, the whole procedure can be done in  $O(n^n \cdot (n^2 + m))$   
831 time.

832 Now, we consider the parameter  $m$ . Let  $I = (A, V, (\succeq_v)_{v \in V})$  be an instance of CONGESTED  
833 ASSIGNMENT. We guess (by brute-force searching) the set of empty posts  $A' \subseteq A$  in the sought  
834 solution. Then, we modify  $I$  by removing the posts in  $A'$  from the preference lists of all agents  $v \in V$ ;  
835 denote the new preference list as  $\succeq'_v$ . Let  $I' = (V, A \setminus A', (\succeq'_v)_{v \in V})$  denote the modified instance.

836 Since for assignments with only filled posts, CP and EF are equivalent, we obtain that  $I$  admits an EF  
837 and TG assignment where all posts in  $A'$  are empty and the rest is non-empty if and only if  $I'$  admits  
838 CP assignment where all posts are non-empty. The latter problem can be checked in polynomial via  
839 lines 3–16 in Algorithm 1. Since there are  $2^m$  subsets of empty posts to check, the overall running  
840 time is  $2^m \cdot (n + m)^{O(1)}$ , which is an FPT time with respect to  $m$ .  $\square$

### CLIQUE

841 **Input:** An undirected graph  $G=(U, E)$ , an integer  $h \geq 0$ .

**Question:** Does  $G$  admit a *clique* of size  $h$ , i.e., a size- $h$  subset  $U' \subseteq U$  which induces a  
complete subgraph?

## 842 D.3 Proof of Theorem 4

843 **Theorem 4** (★). MAXCP+TG is W[1]-hard with respect to the number  $t$  of unsatisfied agents and  
844 can be solved in  $\mathcal{O}(n^t m^t)$  time, where  $n$  and  $m$  denote the number of agents and the number of posts,  
845 respectively; hardness holds even if there are no ties.

846 *Proof.* We first show the W[1]-hardness by providing a parameterized reduction from the CLIQUE  
847 problem. Let  $I = (G = (U, E), h)$  denote an instance of CLIQUE with  $U = \{u_1, \dots, u_{|U|}\}$  and  
848  $E = \{e_1, \dots, e_{|E|}\}$ . We create a MAXCP+TG instance  $I' = (A, V, (\succeq_v)_{v \in V}, k)$  as follows. Let  
849  $k = h + h(h - 1)$ . We will see that the agents corresponding to the vertices and edges of a size- $h$   
850 clique are the only unsatisfied agents.

- 851 – For each vertex  $u_i \in U$ , create a *vertex-post*  $a_i$ , a *vertex-agent*  $w_i$ , and  $h - 1$  copies of  $w_i$ , denoted  
852 as  $\tilde{w}_i^z$  with  $z \in [h - 1]$ .
- 853 – For each edge  $e_\ell \in E$  with  $e_\ell = \{u_i, u_j\}$ , create an *edge-post*  $b_\ell$  and three *edge-agents*  $e_\ell^*$ ,  $e_\ell^i$ , and  
854  $e_\ell^j$ .
- 855 – Create  $L$  dummy agents  $x_1, \dots, x_L$  with  $L = |U|(h - 2) + (|U| - h - 1) + (h(h - 1) - 1) +$   
856  $(|E| - \binom{h}{2} - 1) + (k + 1)$ ; note that  $L$  is a very large number.
- 857 – Create five auxiliary posts  $a_0, \tilde{a}_0, b_0, y, c_0$ . Post  $y$  shall accommodate all dummy agents, while  $c_0$   
858 is a “blocker” making sure that agents are assigned to desired posts.

859 Let  $V = W \cup \bigcup_{u_i \in U} \tilde{W}_i \cup \{e_\ell^*, e_\ell^i, e_\ell^j \mid e_\ell \in E, e_\ell = \{u_i, u_j\}\} \cup \{x_i \mid i \in [L]\}$ , and  
860  $A = \{a_i \mid u_i \in U\} \cup \{b_\ell \mid e_\ell \in E\} \cup \{a_0, \tilde{a}_0, b_0, y, c_0\}$ , where  $W = \{w_i \mid u_i \in U\}$  and  
861  $\tilde{W}_i = \{\tilde{w}_i^z \mid z \in [h]\}$ . Let  $n = |V|$ .

862 **Preferences.** We describe the preferences of the agents, restricted to the first  $n$  tuples. Here,  
863  $\langle \alpha, s, t \rangle = (\alpha, s) \succ (\alpha, s + 1) \succ \dots \succ (\alpha, t)$  depict the preference list on tuples for post  $\alpha$  and  
864 congestions ranging between  $s$  and  $t$ .

865 – The dummy agent  $x_i$  with  $i \in [L]$  has the following preference list:

$$\begin{aligned} x_i: & \langle a_1, 1, h-2 \rangle \succ \langle a_2, 1, h-2 \rangle \succ \dots \succ \langle a_{|U|}, 1, h-2 \rangle \succ \\ & \langle a_0, 1, |U| - h - 1 \rangle \succ \langle \tilde{a}_0, 1, h(h-1) - 1 \rangle \succ \\ & \langle b_0, 1, |E| - \binom{h}{2} - 1 \rangle \succ \langle y, 1, L \rangle \succ \\ & \langle c_0, 1, n + (k+1) - 2L \rangle. \end{aligned}$$

866 *The dummy agents shall ensure some minimum number of agents assigned to each post (except  $b_\ell$*   
 867 *and  $y$ ): At least  $h-1$ ,  $|U| - h$ ,  $h(h-1)$ , and  $|E| - \binom{h}{2}$  agents are to be assigned to  $a_i$  ( $i \in [|U|]$ ),*  
 868  *$a_0$ ,  $\tilde{a}_0$ , and  $b_0$ , respectively. The reason is that since at least  $k+1$  dummy agents are to be*  
 869 *assigned to  $y$ , they would envy the agents assigned to a post if its congestion is less than or equal*  
 870 *to the maximum congestion of  $x_i$  to that post, which is not possible for a yes instance. Indeed,*  
 871 *the dummy agents can only be assigned to  $y$ .*

872 – The vertex-agent  $w_i$  with  $i \in [|U|]$  has the following preference list:

$$\begin{aligned} w_i: & \langle a_0, 1, |U| - h - 1 \rangle \succ \langle a_i, 1, h-2 \rangle \succ \\ & (a_0, |U| - h) \succ (a_i, h-1) \succ (a_i, h) \succ \langle c_0, 1, n - |U| \rangle. \end{aligned}$$

873 *We will see that exactly  $|U| - h$  vertex-agents  $w_i$  are assigned to  $a_0$ . Consequently, the remaining  $h$*   
 874 *vertex-agents must be assigned to  $a_j$  with  $j \in [|U|]$ , which shall correspond to the clique-vertices*  
 875 *if  $G$  admit a size- $h$  clique.*

876 – Each copy  $\tilde{w}_i^z$  with  $i \in [|U|]$  and  $z \in [h-1]$  of a vertex-agent has the same preference list:

$$\begin{aligned} \tilde{w}_i^z: & \langle \tilde{a}_0, 1, h(h-1) - 1 \rangle \succ \langle a_i, 1, h-1 \rangle \succ \\ & (\tilde{a}_0, h(h-1)) \succ \langle c_0, 1, n - (h+1)(h-1) \rangle. \end{aligned}$$

877 *The copy-agents shall ensure that all  $\tilde{w}_i^z$ ,  $z \in [h-1]$ , are jointly assigned to either  $\tilde{a}_0$  or  $a_i$ . If*  
 878 *they are assigned to  $a_i$ , then no other agent (including  $w_i$ ) can be assigned to  $a_i$ . This corresponds*  
 879 *to the case that the vertex  $u_i$  is not in the clique.*

880 – The edge-agents  $e_\ell^*$ ,  $e_\ell^i$  and  $e_\ell^j$  with  $e_\ell = \{u_i, u_j\}$  have the preference lists:

$$\begin{aligned} e_\ell^*: & \langle b_0, 1, |E| - \binom{h}{2} - 1 \rangle \succ (b_\ell, 1) \succ (b_0, |E| - \binom{h}{2}) \succ \\ & (b_\ell, 2) \succ \langle c_0, 1, n - (|E| - \binom{h}{2}) - 2 \rangle. \\ e_\ell^i: & (b_\ell, 1) \succ (b_\ell, 2) \succ \langle a_i, 1, h \rangle \succ \langle c_0, 1, n - h - 2 \rangle. \\ e_\ell^j: & (b_\ell, 1) \succ (b_\ell, 2) \succ \langle a_j, 1, h \rangle \succ \langle c_0, 1, n - h - 2 \rangle. \end{aligned}$$

881 *Note that  $e_\ell^*$  can only be assigned to  $b_\ell$  or  $b_0$ , and  $e_\ell^i$  (resp.  $e_\ell^j$ ) only to  $a_i$  (resp.  $a_j$ ) or  $b_\ell$ . If  $e_\ell^*$*   
 882 *is assigned to  $b_\ell$  and does not envy other agents, then no other agent can be assigned to  $b_\ell$ , as*  
 883 *otherwise at least  $|E| - \binom{h}{2} + 1$  agents that must be assigned to  $b_0$ , which is impossible due to*  
 884 *top-guarantees. Therefore, if  $e_\ell^*$  is assigned to  $b_\ell$ , then  $e_\ell^i$  and  $e_\ell^j$  have to be assigned to  $a_i$  and*  
 885  *$a_j$ , respectively. We will see that  $e_\ell^*$  cannot be unsatisfied, and having  $e_\ell^i$  and  $e_\ell^j$  assigned to  $a_i$*   
 886 *and  $a_j$  correspond to having the edge  $e_\ell$  in the clique if  $G$  admits a clique of size  $h$ .*

887 The maximum congestions of the agents are depicted in Table 1. Here, we assume that  
 888  $e_\ell = \{u_1, u_{|U|}\}$ .

889

890 **Correctness.** Clearly, the construction can be done in polynomial time. It remains to show  
 891 the correctness, i.e.,  $I$  has a clique of size  $h$  if and only if  $I'$  admits a TG assignment with  
 892  $t = h + h(h-1)$  agents being unsatisfied.

893 **The “only if” part.** Let  $\mathcal{C} \subseteq U$  denote an  $h$ -clique for  $I$ . Let  $E^{\mathcal{C}} \subseteq E$  denote the edge set associated  
 894 with  $\mathcal{C}$ , i.e.,  $E^{\mathcal{C}} = \{e_\ell = \{u_i, u_j\} \mid u_i, u_j \in \mathcal{C}\}$ . Then, we claim that the following assignment  $\Pi$   
 895 is a TG with  $t$  unsatisfied agents.

896 – For each  $u_i \in \mathcal{C}$ , assign  $w_i$  to  $a_i$ , and assign  $\tilde{w}_i^z$  with  $z \in [h-1]$  to  $\tilde{a}_0$ .

|                     | $a_1$   | $\dots$ | $a_{ U }$ | $a_0$         | $\tilde{a}_0$  | $b_\ell$ | $b_0$                    | $y$ | $c_0$                          |
|---------------------|---------|---------|-----------|---------------|----------------|----------|--------------------------|-----|--------------------------------|
| $w_1$               | $h$     | $0$     | $0$       | $ U  - h$     | $0$            | $0$      | $0$                      | $0$ | $n -  U $                      |
| $\vdots$            | $0$     | $h$     | $0$       | $ U  - h$     | $0$            | $0$      | $0$                      | $0$ | $n -  U $                      |
| $w_{ U }$           | $0$     | $0$     | $h$       | $ U  - h$     | $0$            | $0$      | $0$                      | $0$ | $n -  U $                      |
| $\tilde{w}_1^z$     | $h - 1$ | $0$     | $0$       | $0$           | $h(h - 1)$     | $0$      | $0$                      | $0$ | $n - h^2 + 1$                  |
| $\vdots$            | $0$     | $h - 1$ | $0$       | $0$           | $h(h - 1)$     | $0$      | $0$                      | $0$ | $n - h^2 + 1$                  |
| $\tilde{w}_{ U }^z$ | $0$     | $0$     | $h - 1$   | $0$           | $h(h - 1)$     | $0$      | $0$                      | $0$ | $n - h^2 + 1$                  |
| $e_\ell^*$          | $0$     | $0$     | $0$       | $0$           | $0$            | $2$      | $ E  - \binom{h}{2}$     | $0$ | $n - ( E  - \binom{h}{2}) - 2$ |
| $e_\ell^j$          | $h$     | $0$     | $0$       | $0$           | $0$            | $2$      | $0$                      | $0$ | $n - h - 2$                    |
| $e_\ell^i$          | $0$     | $0$     | $h$       | $0$           | $0$            | $2$      | $0$                      | $0$ | $n - h - 2$                    |
| $x_\alpha$          | $h - 2$ | $h - 2$ | $h - 2$   | $ U  - h - 1$ | $h(h - 1) - 1$ | $0$      | $ E  - \binom{h}{2} - 1$ | $L$ | $n + (k + 1) - 2L$             |

Table 1: Maximum congestions of the agents constructed for Theorem 4

- For each  $u_i \notin \mathcal{C}$ , assign  $\tilde{w}_i^z$  with  $z \in [h - 1]$  to  $a_i$ , and assign  $w_i$  to  $a_0$ .
- For each  $e_\ell = \{u_i, u_j\} \in E^C$ , assign  $e_\ell^i$  to  $a_i$ ,  $e_\ell^j$  to  $a_j$ , and  $e_\ell^*$  to  $b_\ell$ .
- For each  $e_\ell = \{u_i, u_j\} \notin E^C$ , assign  $e_\ell^i$  and  $e_\ell^j$  to  $b_\ell$ , and  $e_\ell^*$  to  $b_0$ .
- Assign  $x_\alpha$  to  $y$  with  $\alpha \in [L]$ .

Clearly,  $\Pi$  is TG with the following congestion vector.

**Observation 3.**  $\Pi$  is TG and satisfies the following.

- (i)  $|\Pi(a_0)| = |U| - h$ ,  $|\Pi(\tilde{a}_0)| = h(h - 1)$ ,  $|\Pi(b_0)| = |E| - \binom{h}{2}$ , and  $|\Pi(y)| = L$ .
- (ii) For each  $u_i \in U$ , if  $u_i \in \mathcal{C}$ , then  $|\Pi(a_i)| = h$ ; otherwise  $|\Pi(a_i)| = h - 1$ .
- (iii) For each  $e_\ell \in E$ , if  $e_\ell \in E^C$ , then  $|\Pi(b_\ell)| = 2$ ; otherwise  $|\Pi(b_\ell)| = 1$ .

Let  $V' = \{w_i \mid u_i \in \mathcal{C}\} \cup \{e_\ell^i, e_\ell^j \mid e_\ell \in E^C \text{ with } e_\ell = \{u_i, u_j\}\}$ . Note that  $|V'| = k$ . We aim to show that all agents except those from  $V'$  are satisfied. By the above observation, it is straightforward that every dummy agent  $x_\alpha$  is satisfied, every agent that *does not* correspond to the clique vertices is satisfied, and the copies  $\tilde{w}_i^z$  of all vertex-agents are also satisfied. It remains to consider the edge-agents that are not in  $V'$ . Let  $e_\ell \in E$  with  $e_\ell = \{u_i, u_j\}$ . Clearly, if  $e_\ell \notin E^C$ , then the two edge-agents  $e_\ell^i$  and  $e_\ell^j$  are satisfied since they are assigned to their most preferred post. Agent  $e_\ell^*$  is also satisfied since he is assigned to  $b_0$  with congestion  $|E| - \binom{h}{2}$  which is better than  $(b_\ell, 2)$ . If  $e_\ell \in E^C$ , then agent  $e_\ell^*$  is also satisfied since he is assigned to  $b_\ell$  alone which is better than  $(b_0, |E| - \binom{h}{2})$ . Hence, only the agents in  $V'$  are unsatisfied. Since  $|V'| = k$ , this concludes the proof for the “only if” direction.

**The “if” part.** Let  $\Pi$  be a TG assignment with at most  $t$  unsatisfied agents. We aim to show that the following vertex subset  $\mathcal{C}$  is a size- $h$  clique:  $\mathcal{C} = \{u_i \mid |\Pi(a_i)| \geq h\}$ . Before we show this, we observe the following regarding the congestions and assignments of the posts.

- Claim D.3.1.** (1)  $|\Pi(a_0)| = |U| - h$ ,  $|\Pi(\tilde{a}_0)| = h(h - 1)$ , and  $|\Pi(b_0)| = |E| - \binom{h}{2}$ .  
(2) For each  $u_i \in U$ , it holds that  $|\Pi(a_i)| \in \{h - 1, h\}$ .  
(3) For each  $e_\ell \in E$ , it holds that  $|\Pi(b_\ell)| \leq 2$ .  
(4)  $\Pi(a_0) \subseteq \{w_i \mid u_i \in U\}$ ,  $\Pi(\tilde{a}_0) \subseteq \{\tilde{w}_i^z \mid i \in [|U|], z \in [h - 1]\}$ , and  $\Pi(b_0) \subseteq \{e_\ell^* \mid e_\ell \in E\}$ .  
(5) All edge-agents  $E^* = \{e_\ell^* \mid e_\ell \in E\}$  are satisfied.

*Proof.* We show the first two statements together by considering the dummy agents.

Since  $\Pi$  is TG and the maximum congestion of dummy  $x_\alpha$  for  $a_0, \tilde{a}_0, b_0$ , and  $a_i$  with  $i \in [|U|]$  are  $|U| - h - 1, h(h - 1) - 1, |E| - \binom{h}{2} - 1$ , and  $h - 2$ , respectively, we infer by simple calculation that there are more than  $k$  dummy agents who are assigned to  $y$  or  $c_0$ . Since  $\Pi$  does not have more than  $t$  unsatisfied agents, this further implies that there is at least one satisfied dummy agent  $x_\alpha$  who is assigned to  $y$  or  $c_0$ . By his preferences, every tuple that he prefers to  $(y, k + 1)$  must have congestion that exceeds his maximum durable congestion. This implies that  $|\Pi(a_0)| \geq |U| - h$ ,  $|\Pi(\tilde{a}_0)| \geq h(h - 1)$ , and  $|\Pi(b_0)| \geq |E| - \binom{h}{2}$ , for  $|\Pi(a_i)| \geq h - 1$ . Since no agent allows more than the aforementioned congestions,

tions (except for  $a_i$ ), we further infer that  $|\Pi(a_0)| = |U| - h$ ,  $|\Pi(\tilde{a}_0)| = h(h-1)$ , and  $|\Pi(b_0)| = |E| - \binom{h}{2}$ . For  $a_i$ , since the maximum congestion of any agent for  $a_i$  is  $h$ , we infer that  $h-1 \leq |\Pi(a_i)| \leq h$ .

Statement (3) is straightforward by observing the maximum congestion of any agent towards  $b_\ell$  is two.

The first part of statement (4) follows from the fact that the only agents that have  $(a_0, |U| - h)$  in their top  $n$  choices are the vertex-agents. Similarly, we can show that the other parts of the statement are also correct.

To show statement (5), let us analyze which agents are unsatisfied. To this end, define  $W' = \{w_i \in W \mid w_i \notin \Pi(a_0)\}$ . By statements (1) and (4), we infer that  $|W'| = h$ .

Further, every agent  $w_i$  in  $W'$  is unsatisfied since by statement (2) that  $|\Pi(a_i)| \geq h-1$ , any agent not assigned to  $a_0$  will envy those that are assigned to  $a_0$ . This implies that at most  $\binom{h}{2}$  agents other than  $W'$  can be unsatisfied.

By statement (2), partition  $\{a_i \mid u_i \in U\}$  into  $A_1$  and  $A_2$  with  $A_1 = \{a_i \mid u_i \in U \wedge |\Pi(a_i)| = h-1\}$  and  $A_2 = \{a_i \mid u_i \in U \wedge |\Pi(a_i)| = h\}$ . Note that by the top-guarantees, every post  $a_i$  from  $A_2$  can only be assigned vertex-agents  $w_i$  or edge-agent  $e_\ell^i$  for some edge  $e_\ell \in E$  with  $u_i \in e_\ell$ . However, this implies that every agent assigned to post  $a_i \in A_2$  is unsatisfied since  $w_i$  prefers  $(a_0, |U| - h)$  to  $(a_i, h-1)$  and every edge-agent  $e_\ell^i$  (with  $u_i \in e_\ell$ ) prefers  $(b_\ell, 2)$  to  $(a_i, h)$ ; recall by statements (1) and (3) that  $|\Pi(a_0)| = |U| - h$  and  $|\Pi(b_\ell)| \leq 2$ . This further implies that  $|A_2| \leq h$  since  $k = h + h(h-1) = h^2$ .

By statement (1), we have that  $|\Pi(\tilde{a}_0)| = h(h-1)$ . Since every vertex-agent has  $h-1$  copies, there are at least  $h$  vertices each of which has a copy-agent assigned to  $\tilde{a}_0$ . Since every copy-agent corresponding to vertex  $u_i$  prefers  $(a_i, h-1)$   $(\tilde{a}_0, h(h-1))$ , it follows that at least  $h - |A_2|$  copy-agents will be unsatisfied, namely those whose corresponding vertex-post has congestion  $h-1$ .

Since at most  $h$  vertex-agents and at most  $(|U| - h)(h-1)$  copy-agents can be assigned to any vertex-post  $a_i$ , the number of edge-agents  $e_\ell^i$  that have to be assigned to some post  $a_i$  is at least

$$\begin{aligned} |A_1|(h-1) + |A_2|h - (|U| - h)(h-1) \\ = h(h-1) - (h - |A_2|). \end{aligned}$$

Observe that each edge-agent  $e_\ell^i$  that is assigned to some vertex-post  $a_i$  is unsatisfied. This implies that at least  $h(h-1) - (h - |A_2|)$  edge-agents are unsatisfied. Together with the  $h - |A_2|$  unsatisfied copy-agents, no more other agent can be unsatisfied. In other words, every edge-agent  $e_\ell^i$  must be satisfied, as desired.

Now, we turn to the XP result. The idea is to guess the unsatisfied agents and the posts that they are assigned to, and replace them with dummies and run Algorithm 1 for the reduced instance. More precisely, we guess who are the unsatisfied agents in  $O(n^t)$  time; denoting the set of unsatisfied agents as  $V^* = \{v_1^*, \dots, v_t^*\}$ . For each  $V^*$ , we further guess which posts they are assigned to in  $O(m^t)$  time; let  $a_z^*$  denote the guessed post that  $v_z^*$  will be assigned to,  $z \in [t]$ .

Then we create  $t$  dummy agents  $P = \{p_z \mid z \in [t]\}$  and set their preference list as  $p_z: (a_z^*, 1) \succ \dots \succ (a_z^*, n) \succ \dots$ . We replace the agents  $V^*$  with the dummies and use Algorithm 1 to solve the resulting instance. If Algorithm 1 returns no on the current guess, we proceed with the next guess; otherwise, let  $\Pi$  be CP assignment returned by Algorithm 1. It is straightforward that replacing each dummy  $P_z$  with  $v_z^*$  in the assignment yields a TG assignment with at most  $t$  unsatisfied agents.

The overall running time is  $O(n^t m^t)$ . (end of the proof of Claim D.3.1  $\diamond$ )

Now, we are ready to show that  $\mathcal{C}$  is a clique of size  $h$ .

We first show that  $\mathcal{C}$  has size  $h$ . Define  $W' = \{w_i \mid \Pi(w_i) \neq a_0\}$ . By the preferences of the vertex-agents and by Claim D.3.1(1),  $|W'| = h$  and every vertex-agent in  $W'$  is unsatisfied. By Claim D.3.1(1) and (5), every edge-agent  $e_\ell^*$  that is not assigned to  $b_0$  must be assigned to the corresponding edge-post  $b_\ell$  with congestion one. This implies that the remaining two edge-agents  $e_\ell^i$  and  $e_\ell^j$  with  $e_\ell = \{u_i, u_j\}$  are not assigned to  $b_\ell$  and hence unsatisfied; they both envy  $e_\ell^*$ . Define  $E' = \{e_\ell^i, e_\ell^j \mid \Pi(e_\ell^*) = b_\ell\}$ . Then,  $|E'| = h(h-1)$  and it yields  $h(h-1)$  unsatisfied edge-agents by Claim D.3.1(1). Together with the  $h$  unsatisfied vertex-agents in  $W'$ , we infer that every copy-agent  $\tilde{w}_i^z$  is satisfied. In particular, it means that for each copy-agent  $\tilde{w}_i^z$  that is assigned to  $\tilde{a}_0$  it

must hold that  $|\Pi(a_i)| = h$ . Recall that there are at least  $h$  vertices  $u_i$  each of which has a copy-agent assigned to  $\tilde{a}_0$ . This further implies that there are at least  $h$  vertex-posts that each have congestion  $h$ , that is  $|\mathcal{C}| = h$ .

It remains to show that  $\mathcal{C}$  is a clique.

By Claim D.3.1(5), for each edge  $e_\ell$  with  $\Pi(e_\ell^*) = b_0$  it must hold that  $\Pi(b_\ell) = \{e_\ell^i, e_\ell^j\}$  where  $e_\ell = \{u_i, u_j\}$  as otherwise  $e_\ell^*$  would envy the only agent that is assigned to  $b_\ell$  (recall that  $|\Pi(b_\ell)| \in \{1, 2\}$ ). This implies that there are at most  $h(h-1)$  edge-agents that can be assigned to any vertex-post  $a_i$ . They all come from  $E'$ . By previous reasoning, there are exactly  $h$  vertex-posts that each have congestion  $h$ . This implies by the maximum congestions that each such vertex-post  $a_i$  of congestion  $h$  must accommodate vertex-agent  $u_i$  and  $h-1$  “incident” edge-agents  $e_\ell^i$  with  $e_\ell \in E'$ . These  $h(h-1)$  edge-agents are exactly those from  $E'$  and correspond to at least  $\binom{h}{2}$  incident edges of the  $h$  vertices from  $\mathcal{C}$ . They form a clique only if these incident edges are of size exactly  $\binom{h}{2}$ . This is the case since  $E'$  corresponds to exactly  $\binom{h}{2}$  edges, they form a clique of size  $h$ , as desired.  $\square$

#### D.4 Proof of Theorem 5

**Theorem 5** ( $\star$ ). *MAXCP+TG is FPT with respect to  $n$ , and XP with respect to  $m$ , where  $n$  and  $m$  denote the number of agents and the number of posts, respectively.*

*Proof sketch. Parameter  $n$ :* We first guess a subset  $V'$  of unsatisfied agents. Afterwards, similarly to Theorem 3, we guess for each satisfied agent  $V \setminus V'$  one of his first  $n$  tuples and check whether the  $|V \setminus V'|$  guesses yield a valid assignment  $\Pi_{V'}$  and store the number of unsatisfied agents. Finally, we select one valid  $\Pi_{V'}$  with fewest unsatisfied agents. The whole approach can be done in FPT time wrt.  $n$ .

*Parameter  $m$ :* We guess the congestion vector  $\vec{s}$  with  $\vec{s}[j] \in \{0, \dots, n\}$  and  $\Sigma \vec{s} = n$  and use the algorithm behind Lemma 2 to determine the minimum number of unsatisfied agents. The overall running time is  $n^m \cdot (m+n)^{O(1)}$ , which is XP wrt.  $m$ .  $\square$

#### D.5 Proof of Theorem 6

**Theorem 6** ( $\star$ ). *Deciding whether an instance of CONGESTED ASSIGNMENT has an assignment with at most  $k$  unsatisfied agents is W[1]-hard.*

*Proof.* We reduce from the W[1]-complete problem CLIQUE.

Let  $I = (G = (U, E), h)$  denote an instance of CLIQUE with  $U = \{u_1, \dots, u_{\hat{n}}\}$  and  $E = \{e_1, \dots, e_{\hat{m}}\}$  being the vertex set and edge set, respectively. Without loss of generality, we assume that  $\hat{n} > 3h + \binom{h}{2}$  and  $\hat{m} > 2h + 2\binom{h}{2}$  as the problem remains W[1]-hard in this case.

The idea is to construct an instance  $I' = (\mathcal{A}, V, (\succeq_v)_{v \in V})$  of CONGESTED ASSIGNMENT such that the unsatisfied agents correspond to the vertices and edges of a size- $h$  clique. We set the number of unsatisfied agents to  $k = 2h + \binom{h}{2}$ , and let  $L$  and  $R$  be two very large numbers such that  $L > 2k$  and  $R > (L+2) \cdot (\hat{n} + \hat{m}) + h$ . For the sake of brevity, let  $N = (L+2) \cdot (\hat{n} + \hat{m}) + 2R$ , and we will create exactly  $N$  agents.

##### Posts and agents.

- For each vertex  $u_i \in U$ , create one *vertex-post*  $a_i$  and  $L+2$  *vertex-agents*  $w_i, p_i, p_i^z, z \in [L]$ .
- For each edge  $e_\ell \in E$ , create one *edge-post*  $b_\ell$  and  $L+2$  *edge-agents*  $e_\ell, f_\ell^z, z \in [L+1]$ .
- Create  $2R$  dummy agents  $x_z, y_z, z \in [R]$ .
- Create 3 auxiliary posts  $a_0, b_0$ , and  $c_0$ .

Let  $A = \{a_i \mid i \in [\hat{n}]\}$ ,  $B = \{b_\ell \mid \ell \in [\hat{m}]\}$ ,  $W = \{w_i \mid i \in [\hat{n}]\}$ ,  $P = \{p_i \mid i \in [\hat{n}]\}$ ,  $P_i = \{p_i^z \mid z \in [L], i \in [\hat{n}]\}$ ,  $F_\ell = \{f_\ell^z \mid z \in [L+1], \ell \in [\hat{m}]\}$ ,  $X = \{x_z \mid z \in [R]\}$ , and  $Y = \{y_z \mid z \in [R]\}$ . Then, we set  $\mathcal{A} = A \cup B \cup \{a_0, b_0, c_0\}$ , and  $V = W \cup P \cup \bigcup_{i \in [\hat{n}]} P_i \cup E \cup \bigcup_{\ell \in [\hat{m}]} F_\ell \cup X \cup Y$ . In total, we

have created  $\hat{n} + \hat{m} + 3$  posts and  $N$  agents.

1025 **Preferences.** For two numbers  $s, t \in [N]$  and post  $\alpha \in \mathcal{A}$ , let  $\langle \alpha, s, t \rangle = (\alpha, s) \succ (\alpha, s+1) \succ$   
 1026  $\dots \succ (\alpha, t)$  depict the preference list on tuples for post  $\alpha$  and congestions ranging between  $s$  and  $t$ .  
 1027 The notation “\*\*\*” refers to an arbitrary but congestion-averse preferences of the tuples that are not  
 1028 explicitly mentioned.

1029 (i) For each vertex  $u_i \in U$ , the vertex-agents  $w_i \in W$ ,  $p_i \in P$ , and  $p_i^z \in P_i$ ,  $z \in [L]$ , have the  
 1030 following preference lists:

$$\begin{aligned} w_i: & \langle a_0, 1, \hat{n} - h \rangle \succ \langle a_i, 1, L + 2 \rangle \succ \langle c_0, 1, N \rangle \succ *** \\ & \succ \langle b_0, 1, N \rangle \succ \langle a_0, \hat{n} - h + 1, N \rangle, \\ p_i: & \langle a_i, 1, L + 1 \rangle \succ \langle a_0, 1, \hat{n} - h \rangle \succ \langle a_i, L + 2 \rangle \succ \\ & \langle c_0, 1, N \rangle \succ *** \succ \langle b_0, 1, N \rangle \succ \langle a_0, \hat{n} - h + 1, N \rangle, \\ p_i^z: & \langle a_i, 1, L + 2 \rangle \succ \langle c_0, 1, N \rangle \succ *** \succ \langle b_0, 1, N \rangle \succ \\ & \langle a_0, 1, N \rangle. \end{aligned}$$

1031 (ii) For each edge  $e_\ell \in E$ , the edge-agents  $e_\ell$ ,  $f_\ell^z$ ,  $z \in [L + 1]$ , have the following preference lists,  
 1032 where we assume  $e_\ell = \{u_i, u_j\}$ :

$$\begin{aligned} e_\ell: & \langle b_0, 1, \hat{m} - \binom{h}{2} \rangle \succ \langle b_\ell, 1, L + 2 \rangle \succ \langle c_0, 1, N \rangle \succ \\ & *** \succ \langle b_0, \hat{m} - \binom{h}{2} + 1, N \rangle \succ \langle a_0, 1, N \rangle. \\ f_\ell^z: & \langle b_\ell, 1, L + 1 \rangle \succ \langle a_i, 1, L + 1 \rangle \succ \langle a_j, 1, L + 1 \rangle \succ \\ & \langle b_\ell, L + 2 \rangle \succ \langle c_0, 1, N \rangle \succ *** \succ \langle b_0, 1, N \rangle \succ \\ & \langle a_0, 1, N \rangle. \end{aligned}$$

1033 (iii) The preference lists of the dummy agent  $x_z \in X$  and  $y_z \in Y$  are as follows:

$$\begin{aligned} x_z: & \langle a_0, 1, \hat{n} - h - 1 \rangle \succ \langle a_1, 1, L \rangle \succ \dots \succ \langle a_{\hat{n}}, 1, L \rangle \succ \\ & \langle c_0, 1, 2R \rangle \succ \langle a_1, L + 1, N \rangle \succ \dots \succ \langle a_{\hat{n}}, L + 1, N \rangle \succ \\ & \langle c_0, 2R + 1, N \rangle \succ *** \succ \langle b_0, 1, N \rangle \succ \langle a_0, \hat{n} - h, N \rangle \succ \\ & \langle a_0, 1, N \rangle. \\ y_z: & \langle b_0, 1, \hat{m} - \binom{h}{2} - 1 \rangle \succ \langle b_1, 1, L \rangle \succ \dots \succ \langle b_{\hat{m}}, 1, L \rangle \succ \\ & \langle c_0, 1, N \rangle \succ *** \succ \langle b_0, \hat{m} - \binom{h}{2}, N \rangle \succ \langle a_0, 1, N \rangle. \end{aligned}$$

1034 This completes the construction of the instance  $I'$ , which can clearly be done in polynomial time.  
 1035 Note that it is also a parameterized reduction since the parameter  $k = 2h + \binom{h}{2}$  is a polynomial  
 1036 function in  $h$ . It remains to show the correctness, i.e.,  $I$  has a size- $h$  clique if and only if  $I'$  has an  
 1037 assignment with at most  $k$  unsatisfied agents.

1038 For the “**only if**” part, let  $U'$  be a clique of size  $h$ . We construct the following assignment  $\Pi$  and  
 1039 show that it has at most  $k$  unsatisfied agents.

- 1040 (1) For each vertex  $u_i \in U$ , assign all agents from  $P_i \cup \{p_i\}$  to  $a_i$ . Additionally assign  $w_i$  to  $a_i$  if  
 1041  $u_i \in U'$ ; otherwise assign  $w_i$  to  $a_0$ .
- 1042 (2) For each edge  $e_\ell \in E$ , assign all agents from  $F_\ell$  to  $b_\ell$ . Additionally assign  $e_\ell$  to  $b_\ell$  if  $e_\ell \subseteq U'$ ,  
 1043 i.e., both its endpoints are in  $U'$ ; otherwise assign  $e_\ell$  to  $b_0$ .
- 1044 (3) Assign all agents from  $X \cup Y$  to  $c_0$ .

1045 To see who is unsatisfied, let  $W' = \{w_i \in W \mid w_i \in \Pi(a_i)\}$ ,  $P' = \{p_i \in P \mid p_i \in \Pi(a_i)\}$ , and  
 1046  $E' = \{e_\ell \in E \mid e_\ell \in \Pi(b_\ell)\}$ . We claim that all agents but those from  $W' \cup P' \cup E'$  are satisfied.

1047 In the following, we say that a post  $\alpha$  is the *most preferred post* for agent  $q$  if every tuple that is contains  
 1048 a post other than  $\alpha$  is less preferred than  $(\alpha, |\Pi(\alpha)|)$ . Further, a tuple  $(\alpha, d)$  is a *most preferred*  
 1049 *feasible* tuple for agent  $q$  if every tuple  $(\alpha', d')$  that is preferred to  $(\alpha, d)$  has congestion  $|\Pi(\alpha')| > d'$ .



Clearly, every agent in  $X \cup Y$  is satisfied since  $(c_0, 2R)$  is his most preferred *feasible* tuple. Every agent in  $(\bigcup_{i \in [\hat{n}]} P_i) \cup (W \setminus W') \cup (P \setminus P') \cup (E \setminus E')$  is satisfied since he is assigned to his most preferred post. Every agent  $f_\ell^z \in F_\ell$  is also satisfied since either he is assigned to his most preferred post (if  $e_\ell$  is not a “clique” edge) or  $|\Pi(a_i)| = |\Pi(a_j)| = L + 2$  so  $(b_\ell, L + 2)$  remains his most preferred feasible tuple. This concludes the proof for the “only if” direction.

For the “if” direction, let  $\Pi$  denote an assignment with at most  $k$  unsatisfied agents. Before we construct a clique, let us analyze the preferences and  $\Pi$  would look like.

**Claim D.5.1.**  $\Pi$  satisfies the following.

- (1)  $|\Pi(a_0)| = \hat{n} - h$  and  $|\Pi(b_0)| = \hat{m} - \binom{h}{2}$ .
- (2) Every agent from  $W$  that is not assigned to  $a_0$  is unsatisfied and every agent from  $E$  that is not assigned to  $b_0$  is unsatisfied.
- (3) For each  $a_i \in A$  we have that  $|\Pi(a_i)| \geq L + 1$  and for each  $b_\ell \in B$  we have that  $|\Pi(b_\ell)| \geq L + 1$ .
- (4) It holds that  $|\Pi(c_0)| \leq 2R$ .
- (5) For each  $a_i \in A$  we have that  $|\Pi(a_i)| \leq L + 2$  and for each  $b_\ell \in B$  we have that  $|\Pi(b_\ell)| \leq L + 2$ .

*Proof. Statement (1):* The lower bounds are straightforward since all agents from  $W \cup X$  prefer  $(a_0, \hat{n} - h - 1)$  to any other tuple that does not contain  $a_0$ : If  $|\Pi(a_0)| < \hat{n} - h$  would hold, then more than  $|W \cup X| - (\hat{n} - h) > R$  agents will be unsatisfied, which is not possible since  $R > (L + 2) \cdot (\hat{n} + \hat{m}) > k$ . Similar reasoning shows that  $|\Pi(b_0)| \geq \hat{m} - \binom{h}{2}$  by considering the preferences of  $E \cup Y$ . Now, we show the upper bounds. Suppose, for the sake of contradiction, that  $|\Pi(a_0)| > \hat{n} - h$ . Then, since no agent considers  $(a_0, \hat{n} - h + 1)$  more valuable than any other tuple that does not contain  $a_0$ , all agents assigned to  $a_0$  are unsatisfied. Since we can assume that  $\hat{n} > 3h + \binom{h}{2}$ , it follows that more than  $k$  agents will be unsatisfied, a contradiction. Similarly, since we have just shown that  $|\Pi(a_0)| \leq \hat{n} - h$ , from the remaining possible tuples, no agent considers  $(b_0, \hat{m} - \binom{h}{2})$  more valuable than any tuple that does not contain  $b_0$  (except  $(a_0, \hat{n} - h + z)$ ,  $z \geq 1$ , which is excluded). Consequently, by the fact that  $\hat{m} > 2h + 2\binom{h}{2}$ , we infer that  $|\Pi(b_0)| \leq \hat{m} - \binom{h}{2}$  as otherwise all agents assigned to  $b_0$  are unsatisfied the number of which exceeds  $k$ .

*Statement (2):* This statement follows directly from the previous statement and from the preferences of the agents in  $W \cup E$ .

*Statement (3):* We show the lower bound by iterating through all  $i \in [\hat{n}]$ . By Statement (1), every agent in  $X \cup P_1 \cup \{p_1\}$  prefers  $(a_1, L)$  to every other tuple that does not contain  $a_1$  (excluding  $a_0$ ). Hence,  $|\Pi(a_1)| \geq L + 1$  as otherwise more than  $R - L > k$  agents from  $X$  are not assigned to  $a_1$  and will be unsatisfied. By applying the above reasoning for the next  $i \geq 2$ , we infer that  $|\Pi(a_i)| \geq L + 1$  holds for all  $i \in [\hat{n}]$ . Similarly, we infer that  $|\Pi(b_\ell)| \geq L + 1$  holds for every  $\ell \in [\hat{m}]$ .

*Statement (4):* Suppose this is not true, i.e.,  $|\Pi(c_0)| \geq 2R + 1$ . Then, by Statements (1)–(2) and by the bound  $k = 2h + \binom{h}{2}$ , at most  $h$  agents from  $V \setminus (W \cup E)$  can be unsatisfied. By construction, every agent in  $X$  that is assigned to  $c_0$  will be unsatisfied since he prefers  $(a_1, L + 1)$  to  $(c_0, 2R + 1)$ . Hence, at most  $h$  agents from  $X$  can be assigned to  $c_0$ . This means that at least  $2R + 1 - h$  agents from  $W \cup P \cup \bigcup_{i \in [\hat{n}]} P_i \cup E \cup \bigcup_{\ell \in [\hat{m}]} F_\ell \cup Y$  need to be assigned to  $c_0$ . This is not possible however since  $R > (L + 2) \cdot (\hat{n} + \hat{m}) + h$  and  $|Y| = R$ .

*Statement (5):* Let  $i \in [\hat{n}]$ . The statement follows directly from the fact that every agent prefers  $(c_0, 2R)$  to  $(a_i, L + 3)$  and  $|\Pi(c_0)| \leq 2R$  (see Claim D.5.1(1)):  $|\Pi(a_i)| > L + 2$  would hold, then all agents assigned to  $a_i$  are unsatisfied, the number of which exceed  $k$  since  $L > 2k$ . (end of the proof of Claim D.5.1  $\diamond$ )

The next statement is about the structure of the agents assigned to  $A \cup B$ .

**Claim D.5.2.** Let  $A' = \{a_i \in A : |\Pi(a_i)| = L + 2\}$  and  $B' = \{b_\ell \in B : |\Pi(b_\ell)| = L + 2\}$ . Then,  $\Pi$  satisfies the following.

- (1)  $|A'| + |B'| \geq h + \binom{h}{2}$ .

- 1097 (2) For each post  $a_i \in A'$ , at least two agents in  $\Pi(a_i)$  are unsatisfied; for each post  $b_\ell \in B'$ , at  
 1098 least one agent in  $\Pi(b_\ell)$  is unsatisfied.  
 1099 (3)  $|A'| \leq h$  and  $|B'| \geq \binom{h}{2}$ .  
 1100 (4) For each post  $b_\ell \in B'$  it holds that  $|\Pi(a_i)| = |\Pi(a_j)| = L + 2$  where  $e_\ell = \{u_i, u_j\}$ .

1101 *Proof. Statement (1):* This can be shown by simple calculation. By Claim D.5.1(1) and (4), at least  
 1102  $(L + 2) \cdot (\hat{n} + \hat{m}) - (\hat{n} - h) - (\hat{m} - \binom{h}{2}) = (L + 1) \cdot (\hat{n} + \hat{m}) + h + \binom{h}{2}$  agents are assigned to the  
 1103 posts of  $A \cup B$ . By Claim D.5.1(3) and (5), each post in  $A \cup B$  is assigned either  $L + 1$  or  $L + 2$   
 1104 agents. That is, at least  $h + \binom{h}{2}$  of the post in  $A \cup B$  are each assigned  $L + 2$  agents, confirming that  
 1105  $|A'| + |B'| \geq h + \binom{h}{2}$ .

1106 *Statement (2):* For each post  $a_i \in A'$ , since  $|\Pi(a_i)| = L + 2$  and  $|P_i| = L$ , at least two agents in  
 1107  $\Pi(a_i)$  are not from  $P_i$ , i.e.,  $|\Pi(a_i) \setminus P_i| \geq 2$ . We claim that the agents in  $\Pi(a_i) \setminus P_i$  are unsatisfied  
 1108 by considering the preferences of all agents except  $P_i$ : Every agent from  $W \cup P$  prefers  $(a_0, \hat{n} - h)$   
 1109 to  $(a_i, L + 2)$ . Every agent from  $E$  prefers  $(b_0, \hat{m} - \binom{h}{2})$  to  $(a_i, L + 2)$ . Every agent from  
 1110  $(\bigcup_{i' \in [\hat{n}] \setminus \{i\}} P_{i'}) \cup (\bigcup_{\ell \in [\hat{m}]} F_\ell) \cup X \cup Y$  prefers  $(c_0, 2R)$  to  $(a_i, L + 2)$ . Since  $|\Pi(a_0)| = \hat{n} - h$ ,  
 1111  $|\Pi(b_0)| = \hat{m} - \binom{h}{2}$ , and  $|\Pi(c_0)| \leq 2R$  (see Claim D.5.1s(1) and (4)), we infer that every agent in  
 1112  $\Pi(a_i) \setminus P_i$  is unsatisfied.

1113 Similarly, for each post  $b_\ell \in B'$ , since  $|\Pi(b_\ell)| = L + 2$  and  $|F_\ell| = L + 1$ , at least one agent in  $\Pi(b_\ell)$   
 1114 is not from  $F_\ell$ . We claim that the agents in  $\Pi(b_\ell) \setminus F_\ell$  are unsatisfied by considering the preferences  
 1115 of all agents except  $P_i$ : Every agent from  $W \cup P \cup (\bigcup_{i \in [\hat{n}]} P_i) \cup (\bigcup_{\ell' \in [\hat{m}] \setminus \{\ell\}} F_{\ell'}) \cup X \cup Y$  prefers  
 1116  $(c_0, 2R)$  to  $(b_\ell, L + 2)$ . Every agent from  $E$  prefers  $(b_0, \hat{m} - \binom{h}{2})$  to  $(b_\ell, L + 2)$ . Again, since  
 1117  $|\Pi(b_0)| = \hat{m} - \binom{h}{2}$  and  $|\Pi(c_0)| \leq 2R$  (see Claim D.5.1(1) and (4)), we infer that every agent in  
 1118  $\Pi(b_\ell) \setminus F_\ell$  is unsatisfied.

1119 *Statement (3):* Statement (2) implies that at least  $2|A'| + |B'|$  agents are unsatisfied. By the upper  
 1120 bound that  $k \leq 2h + \binom{h}{2}$  and by Statement (1), we infer that  $|A'| \leq h$ , and hence  $|B'| \geq \binom{h}{2}$ .

1121 *Statement (4):* Suppose, towards a contradiction, that  $|\Pi(a_i)| \neq L + 2$ . Then, by Claim D.5.1(3) and  
 1122 (5), it follows that  $|\Pi(a_i)| = L + 1$ . We claim that every agent assigned to  $b_\ell$  is unsatisfied. Let us  
 1123 consider an arbitrary agent  $q \in \Pi(b_\ell)$ . Clearly, if  $q \in W \cup P \cup \bigcup_{\ell \in [\hat{m}]} P_\ell \cup X \cup Y \cup E \cup F \setminus (\{e_\ell\} \cup F_\ell)$ ,  
 1124 then he is unsatisfied since he prefers  $(c_0, 2R)$  to  $(b_\ell, L + 2)$ . If  $q = e_\ell$ , then he is unsatisfied since he  
 1125 prefers  $(b_0, \hat{m} - \binom{h}{2})$  to  $(b_\ell, L + 2)$ , while if  $q \in F_\ell$ , then he is unsatisfied since he prefers  $(a_i, L + 1)$   
 1126 to  $(b_\ell, L + 2)$  as well. This concludes the proof that every agent in  $\Pi(b_\ell)$  is unsatisfied, implying that  
 1127 more than  $L > 2k$  agents is unsatisfied, a contradiction.

1128 Using an analogous reasoning, we can show that  $|\Pi(a_j)| = L + 2$ .  
 1129 2. (end of the proof of Claim D.5.2  $\diamond$ )

1130 Now, we are ready to show the existence of a size- $h$  clique. By Claim D.5.2(3),  $B'$  corresponds  
 1131 to at least  $\binom{h}{2}$  edges. Hence, there are at least  $h$  vertices incident to any edge corresponding to  $B'$ .  
 1132 For each vertex  $a_i$  that is “incident” to any edge-post in  $B'$ , we know by Claim D.5.2(4) that its  
 1133 corresponding vertex-post  $a_i$  must be assigned  $L + 2$  posts. By Claim D.5.2(3), there are at most  $h$   
 1134 such vertex-posts. Hence, there are exactly  $h$  vertex-posts that are each assigned  $L + 2$  agents, and  
 1135 this is possible if and only if they form a size- $h$  clique.  $\square$
